# Supplementary material for: Oxidative C-H/C-H Coupling of Dipyrromethanes with Azines by TiO2-Based Photocatalytic System. Synthesis of New BODIPY Dyes and Their Photophysical and Electrochemical Properties
Source: MDPI journal article supplement (doi:10.3390/molecules26185549), 2021-09-13
Supplement: s1 [file s1]

# Oxidative C-H/C-H Coupling of Dipyrromethanes with Azines by TiO<sub>2</sub>-Based Photocatalytic System. Synthesis of New BODIPY Dyes and Their Photophysical and Electrochemical Properties

Maria A. Trestsova <sup>1</sup>, Irina A. Utepova <sup>1,2,\*</sup>, Oleg N. Chupakhin <sup>1,2</sup>, Maksim V. Semenov <sup>1</sup>, Dmitry N. Pevtsov <sup>3,4</sup>, Lyubov M. Nikolenko <sup>4</sup>, Sergey A. Tovstun <sup>3,4</sup>, Anna V. Gadomska <sup>4</sup>, Alexander V. Shchepochkin <sup>2</sup>, Gregory A. Kim <sup>2</sup>, Vladimir F. Razumov <sup>3,4</sup>, Irina B. Dorosheva <sup>1,5</sup> and Andrey A. Rempel <sup>1,5</sup>

<sup>1</sup> Department of Organic and Biomolecular Chemistry, Ural Federal University, 19 Mira Street, 620002 Ekaterinburg, Russia; maria.trestcova@urfu.ru (M.A.T.); chupakhin@ios.uran.ru (O.N.C.); semmaximwork@gmail.com (M.V.S.); i.b.dorosheva@urfu.ru (I.B.D.); rempel.imet@mail.ru (A.A.R.)

<sup>2</sup> Institute of Organic Synthesis of the Russian Academy of Sciences, 22 S. Kovalevskoy Street, 620108 Ekaterinburg, Russia; sasha-mmm@mail.ru (A.V.S.); kim-g@ios.uran.ru (G.A.K.)

<sup>3</sup> Moscow Institute of Physics and Technology, 9 Institutsky Lane, 141701 Dolgoprudny, Russia; pevtsovdm@gmail.com (D.N.P.); tovstun@icp.ac.ru (S.A.T.); razumov@icp.ac.ru (V.F.R.)

<sup>4</sup> Institute of Problems of Chemical Physics of the Russian Academy of Sciences, 1 Academician Semenov Avenue, 142432 Chernogolovka, Russia; nav@icp.ac.ru (L.M.N.); ann.gadomsky@gmail.com (A.V.G.)

<sup>5</sup> Institute of Metallurgy of the Ural Branch of the Russian Academy of Sciences, 101 Amundsena Street, 620016 Ekaterinburg, Russia

\* Correspondence: i.a.utepova@urfu.ru

## Supplementary Information

### Table of Contents

|                                      |     |
|--------------------------------------|-----|
| NMR spectra of compounds <b>5a-j</b> | S2  |
| NMR spectra of compounds <b>6a-j</b> | S21 |

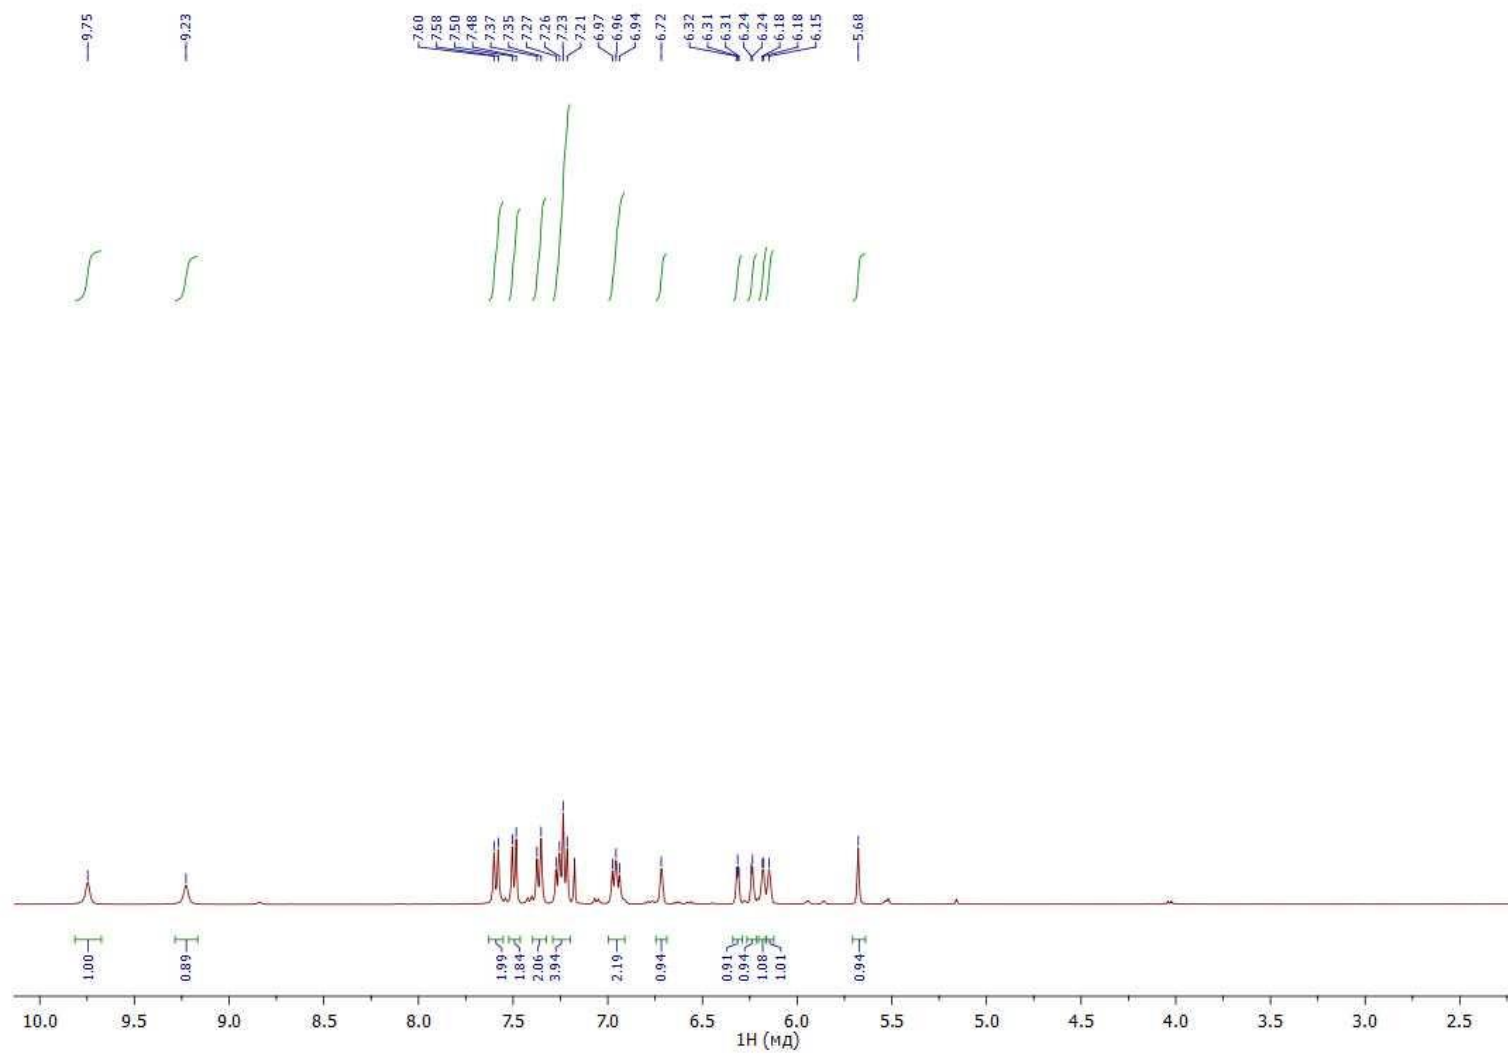

Figure S1. <sup>1</sup>H NMR Spectrum of 5a

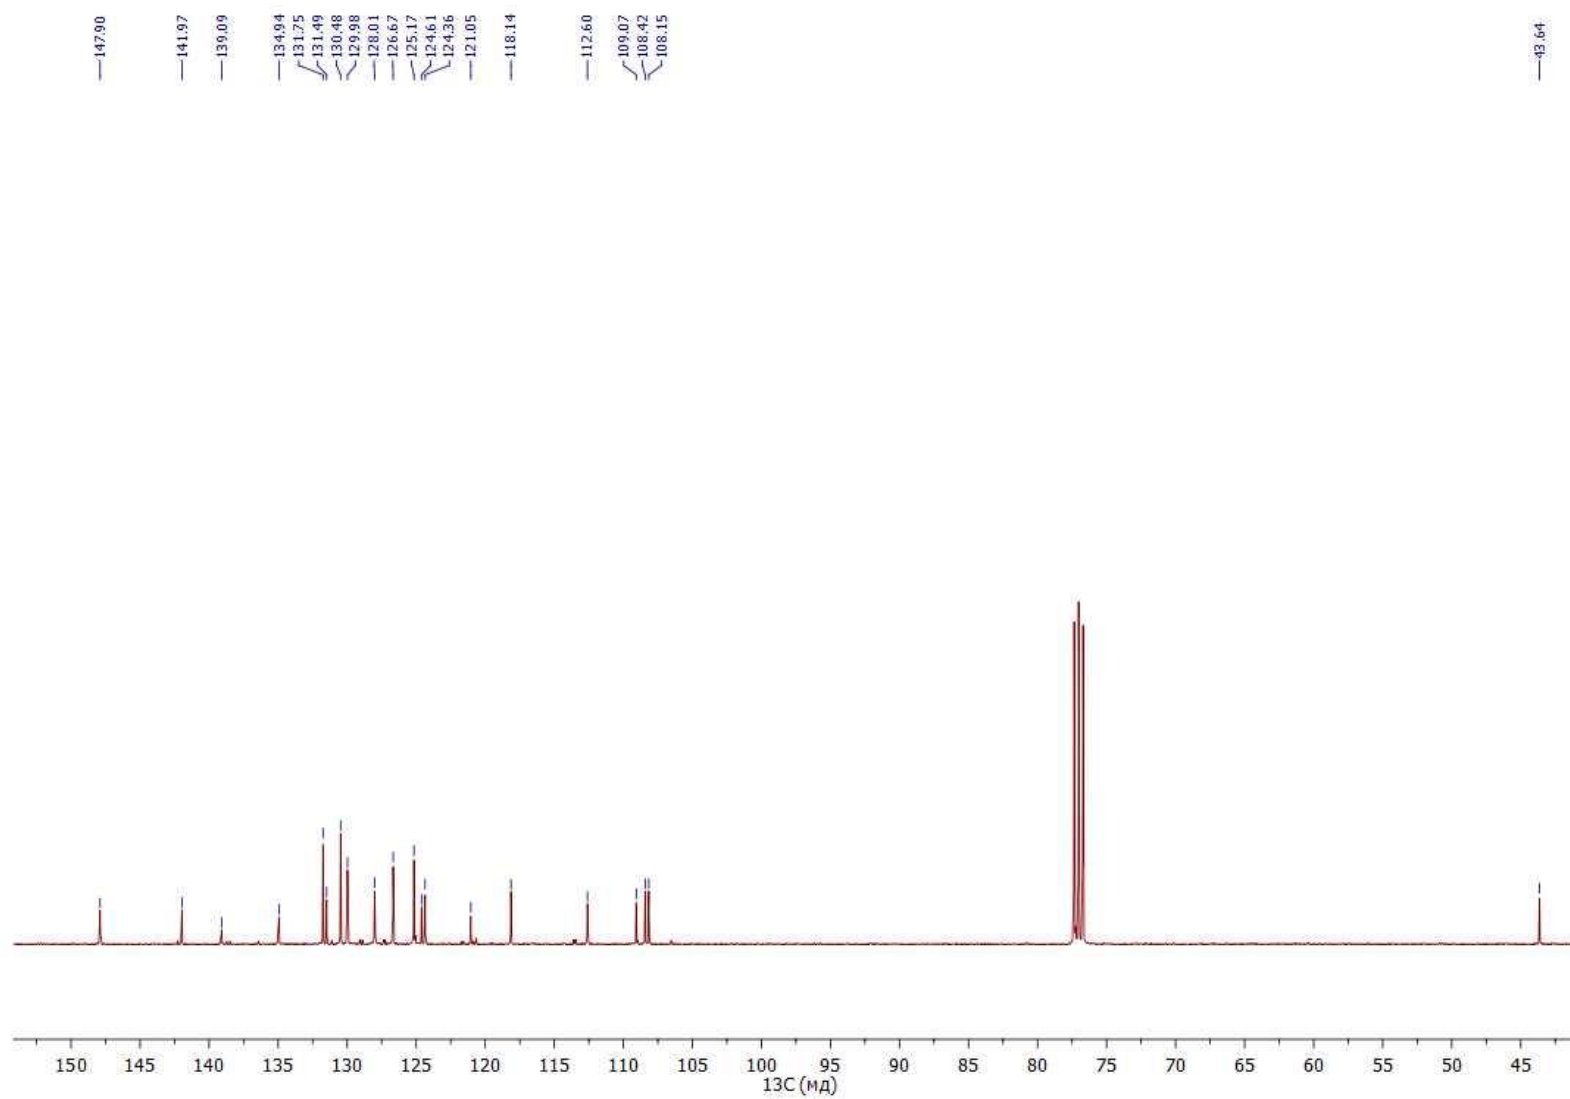

Figure S2. <sup>13</sup>C NMR Spectrum of 5a

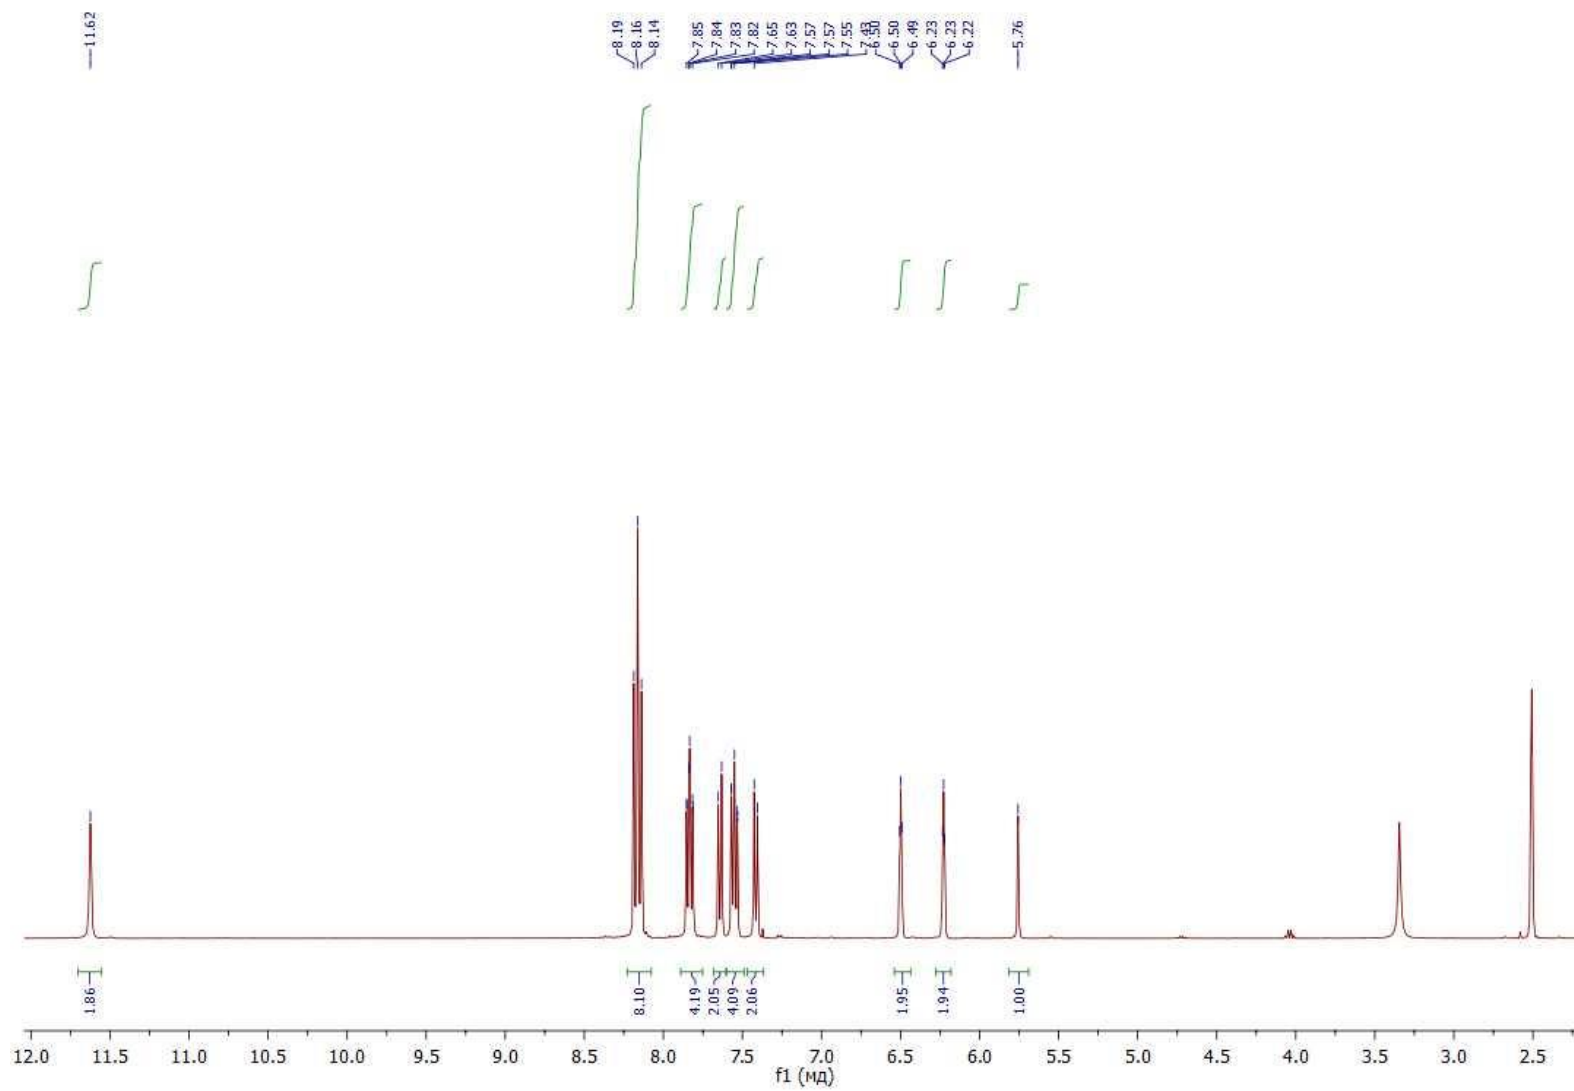

Figure S3. <sup>1</sup>H NMR Spectrum of 5b

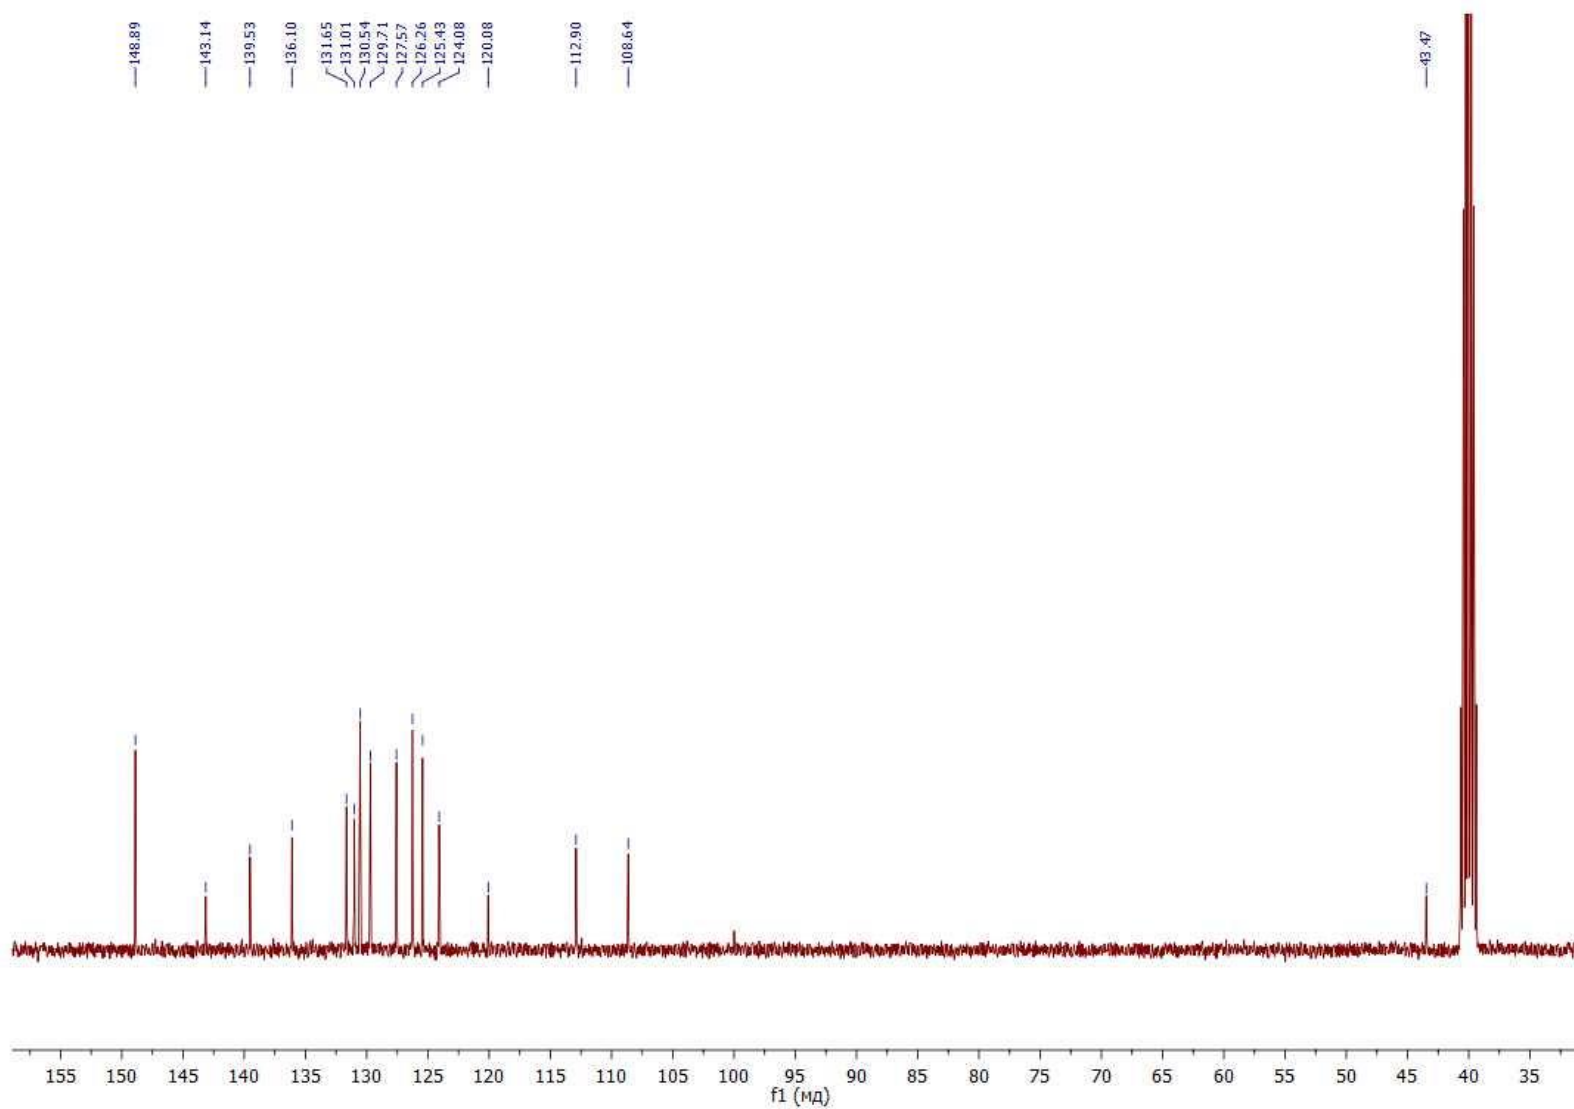

Figure S4.  $^{13}\text{C}$  NMR Spectrum of 5b

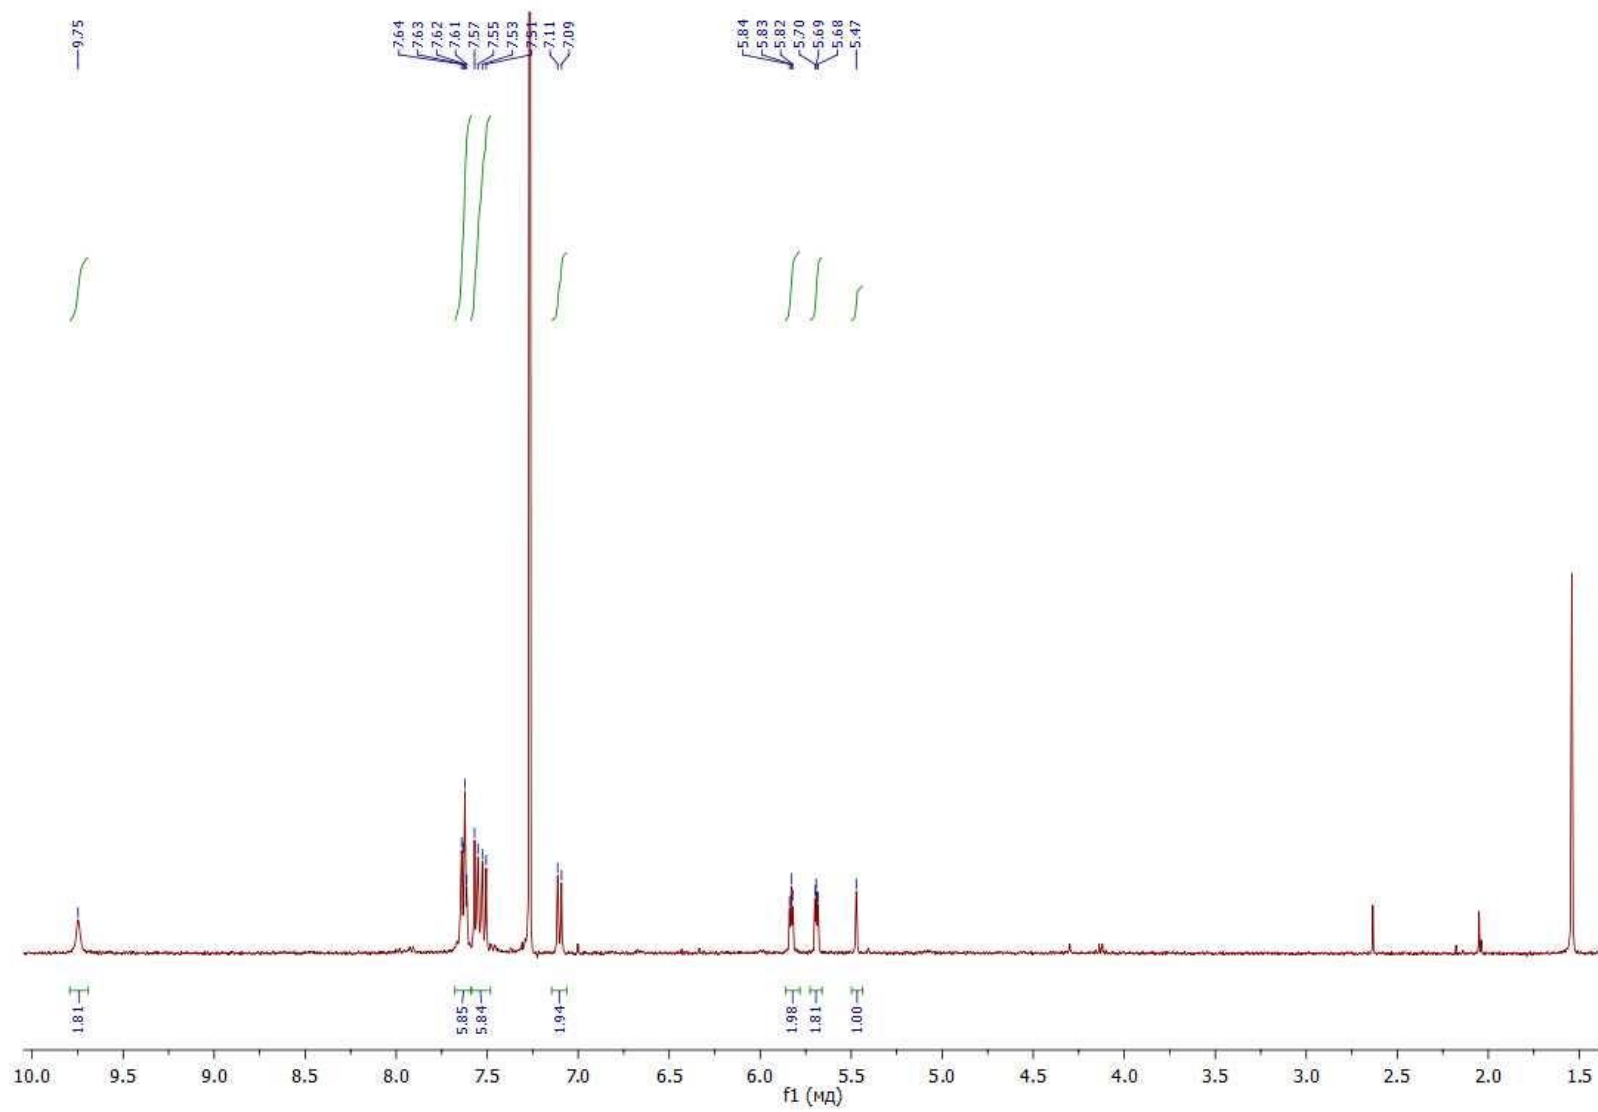

Figure S5. <sup>1</sup>H NMR Spectrum of 5c

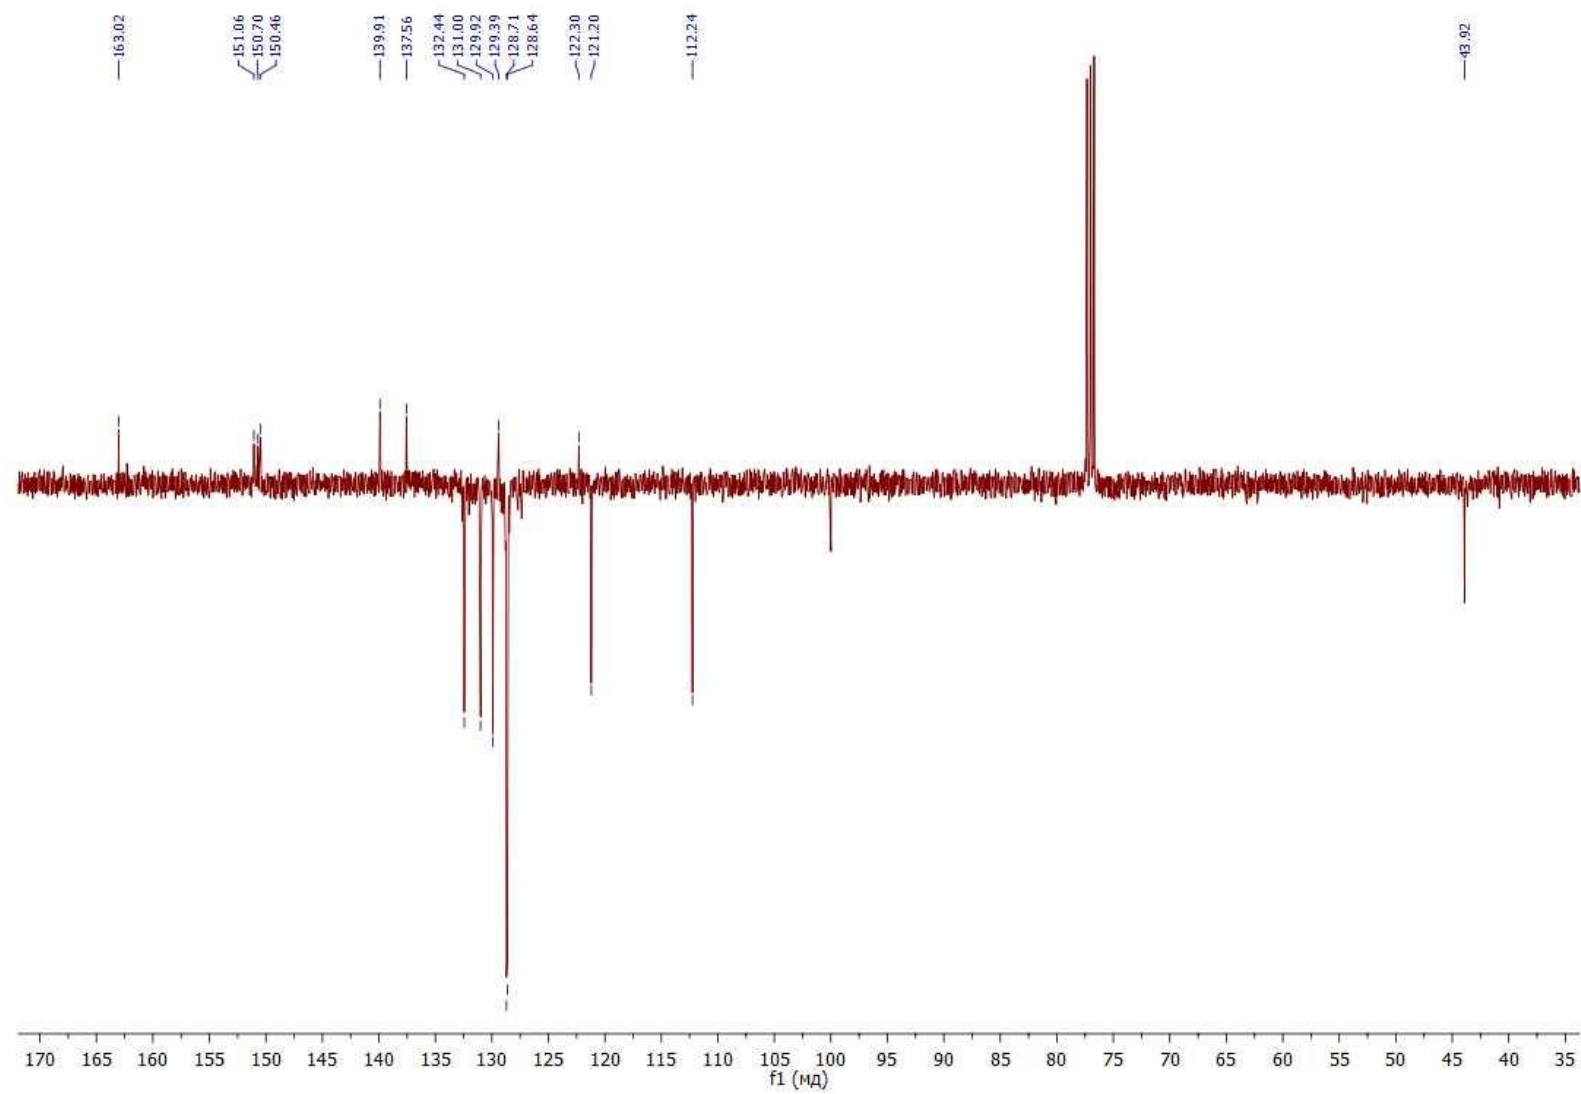

Figure S6. <sup>13</sup>C NMR Spectrum of 5c

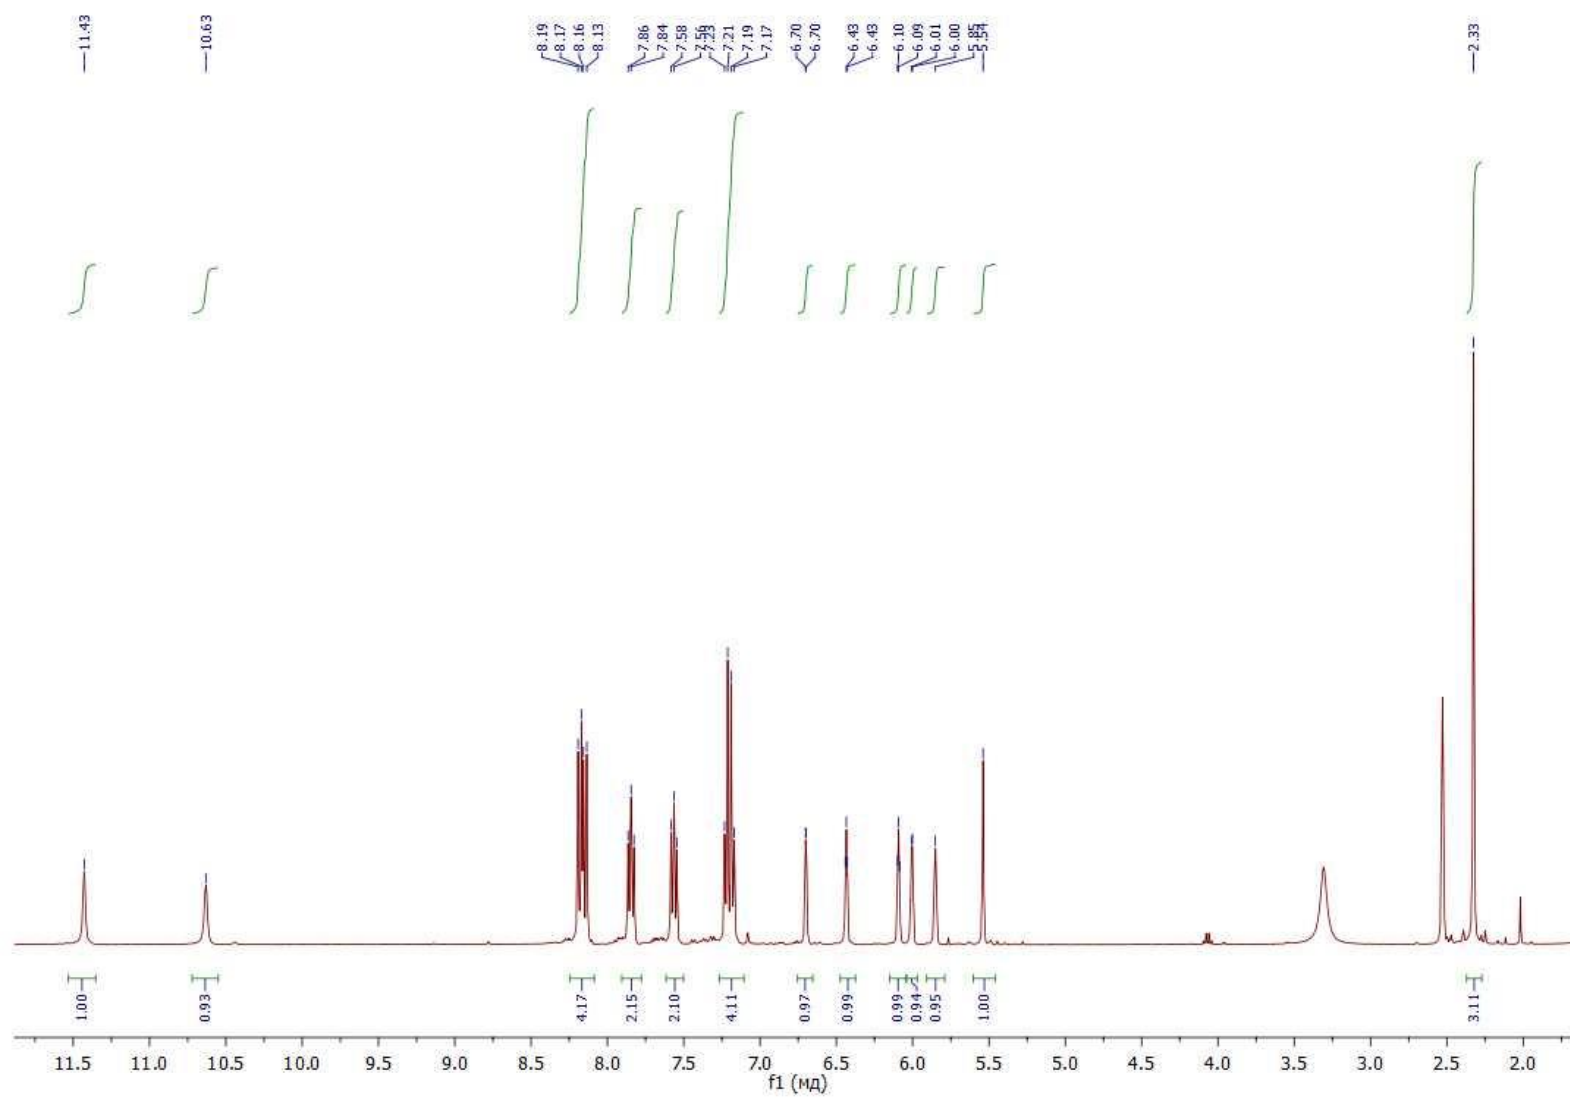

Figure S7. <sup>1</sup>H NMR Spectrum of 5d



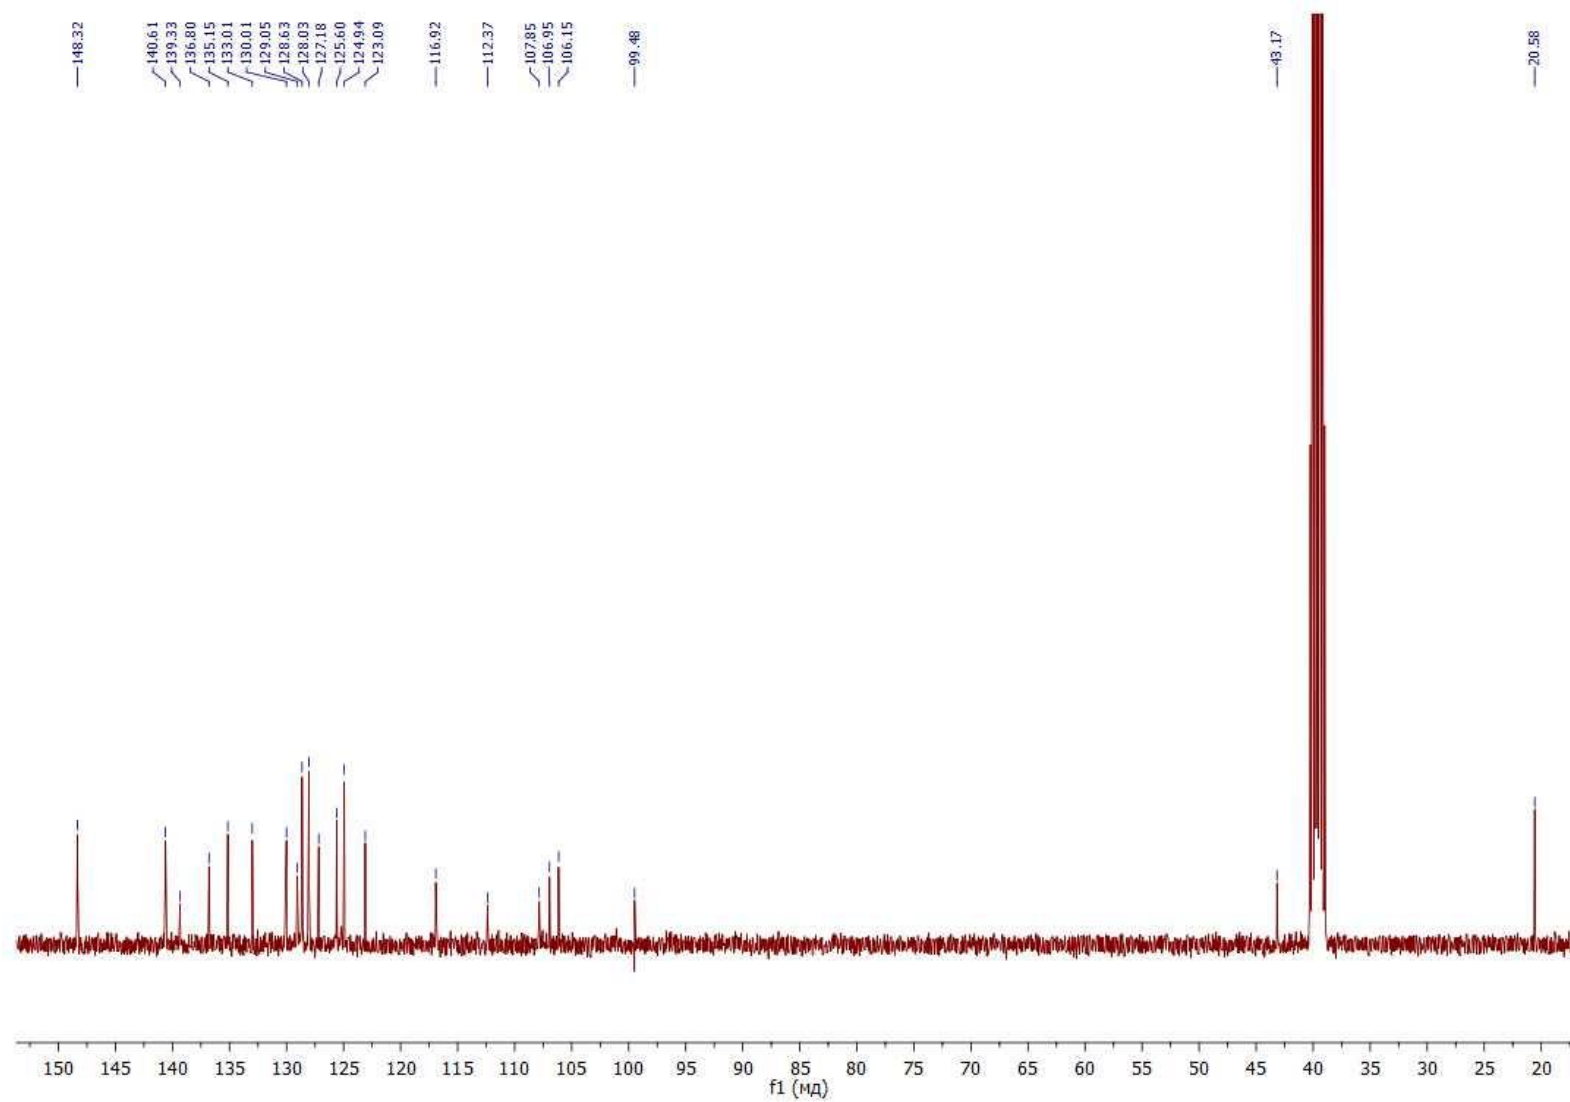

Figure S8.  $^{13}\text{C}$  NMR Spectrum of 5d

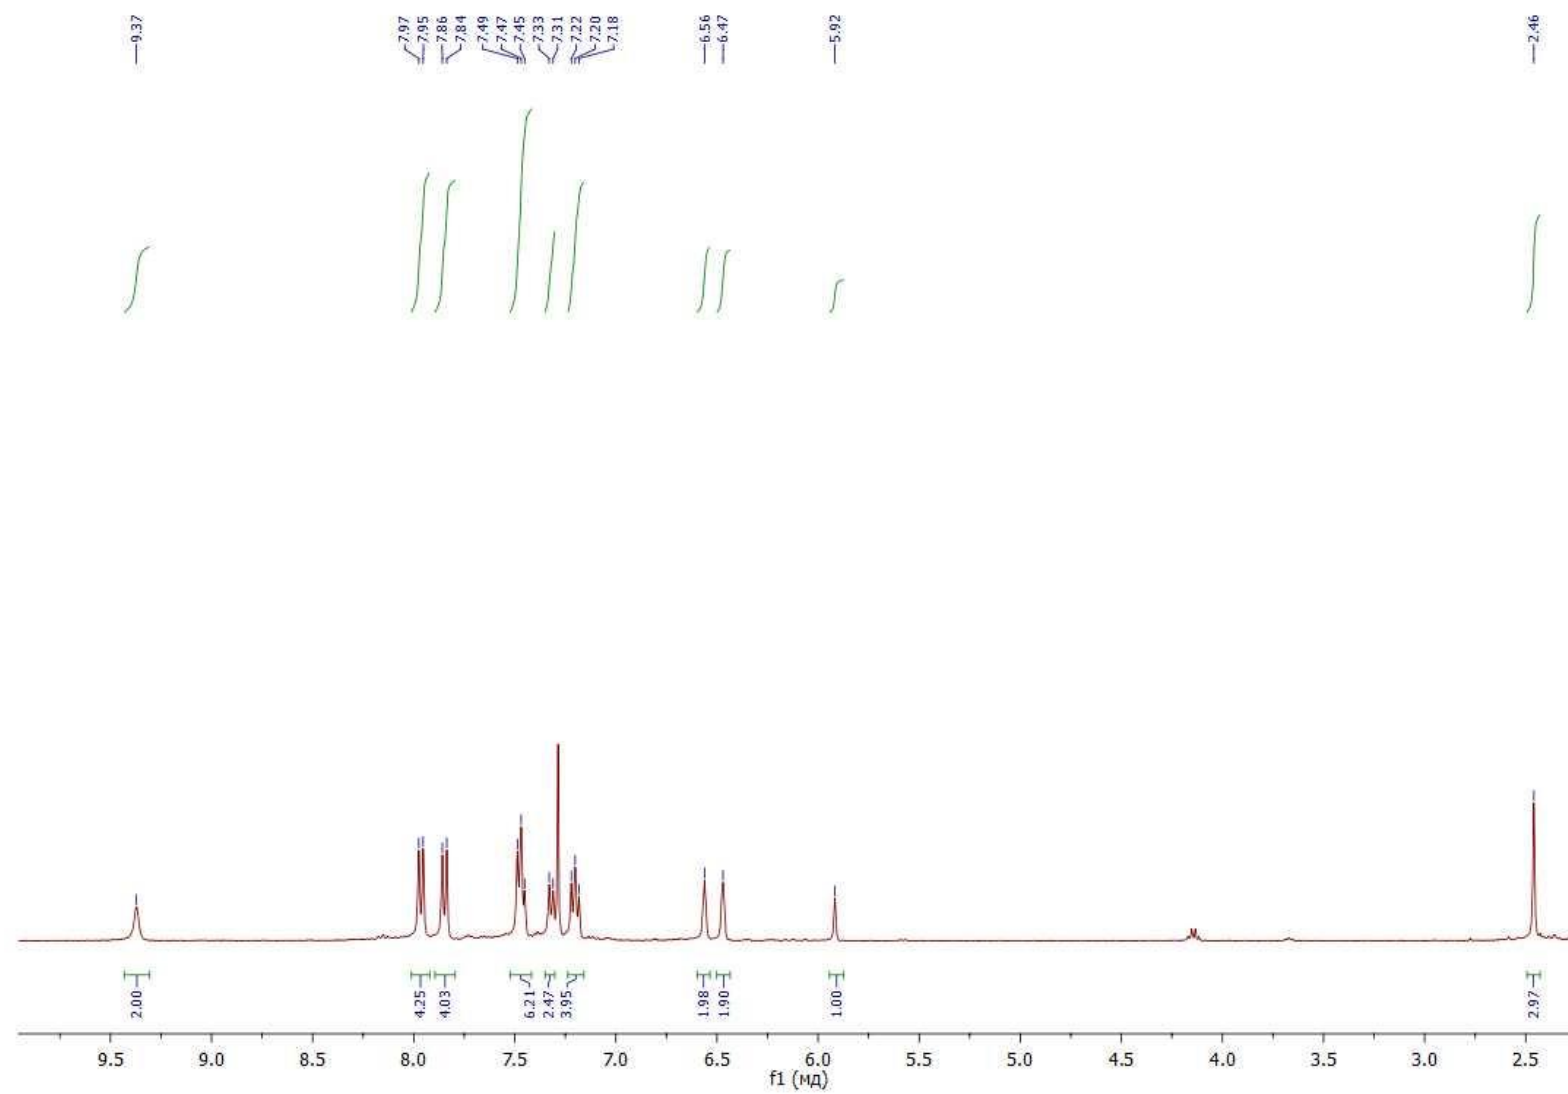

Figure S9. <sup>1</sup>H NMR Spectrum of 5e

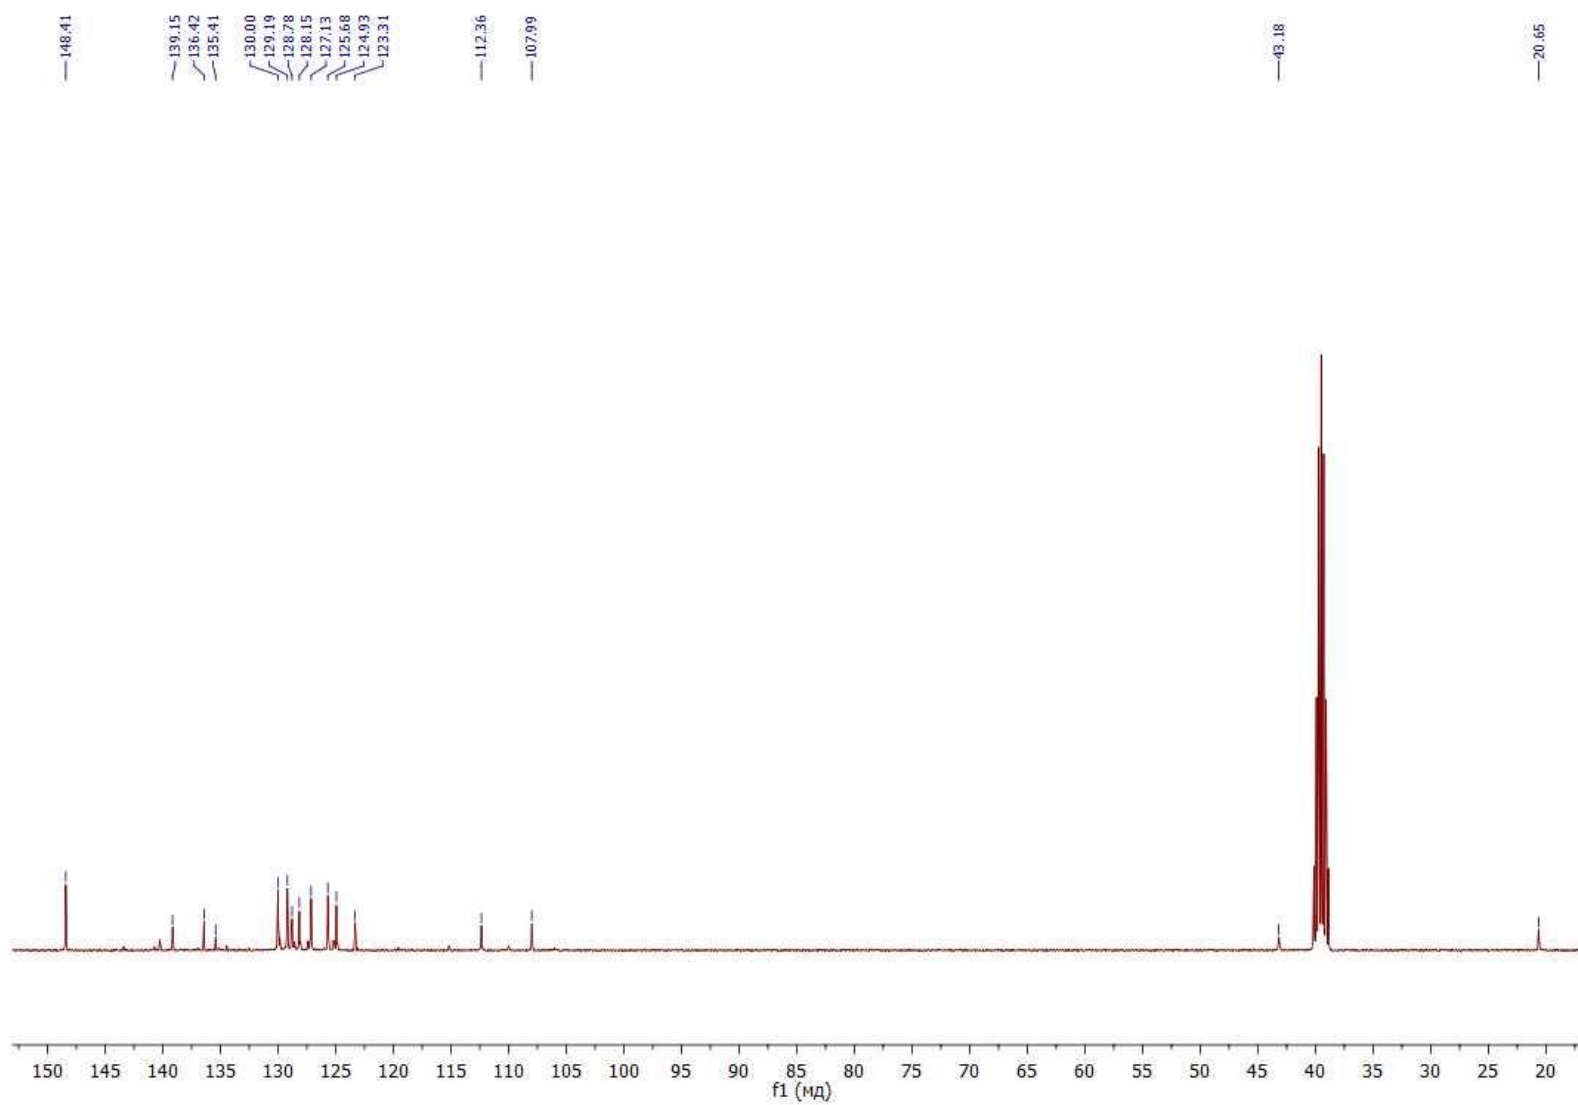

Figure S10.  $^{13}\text{C}$  NMR Spectrum of 5e

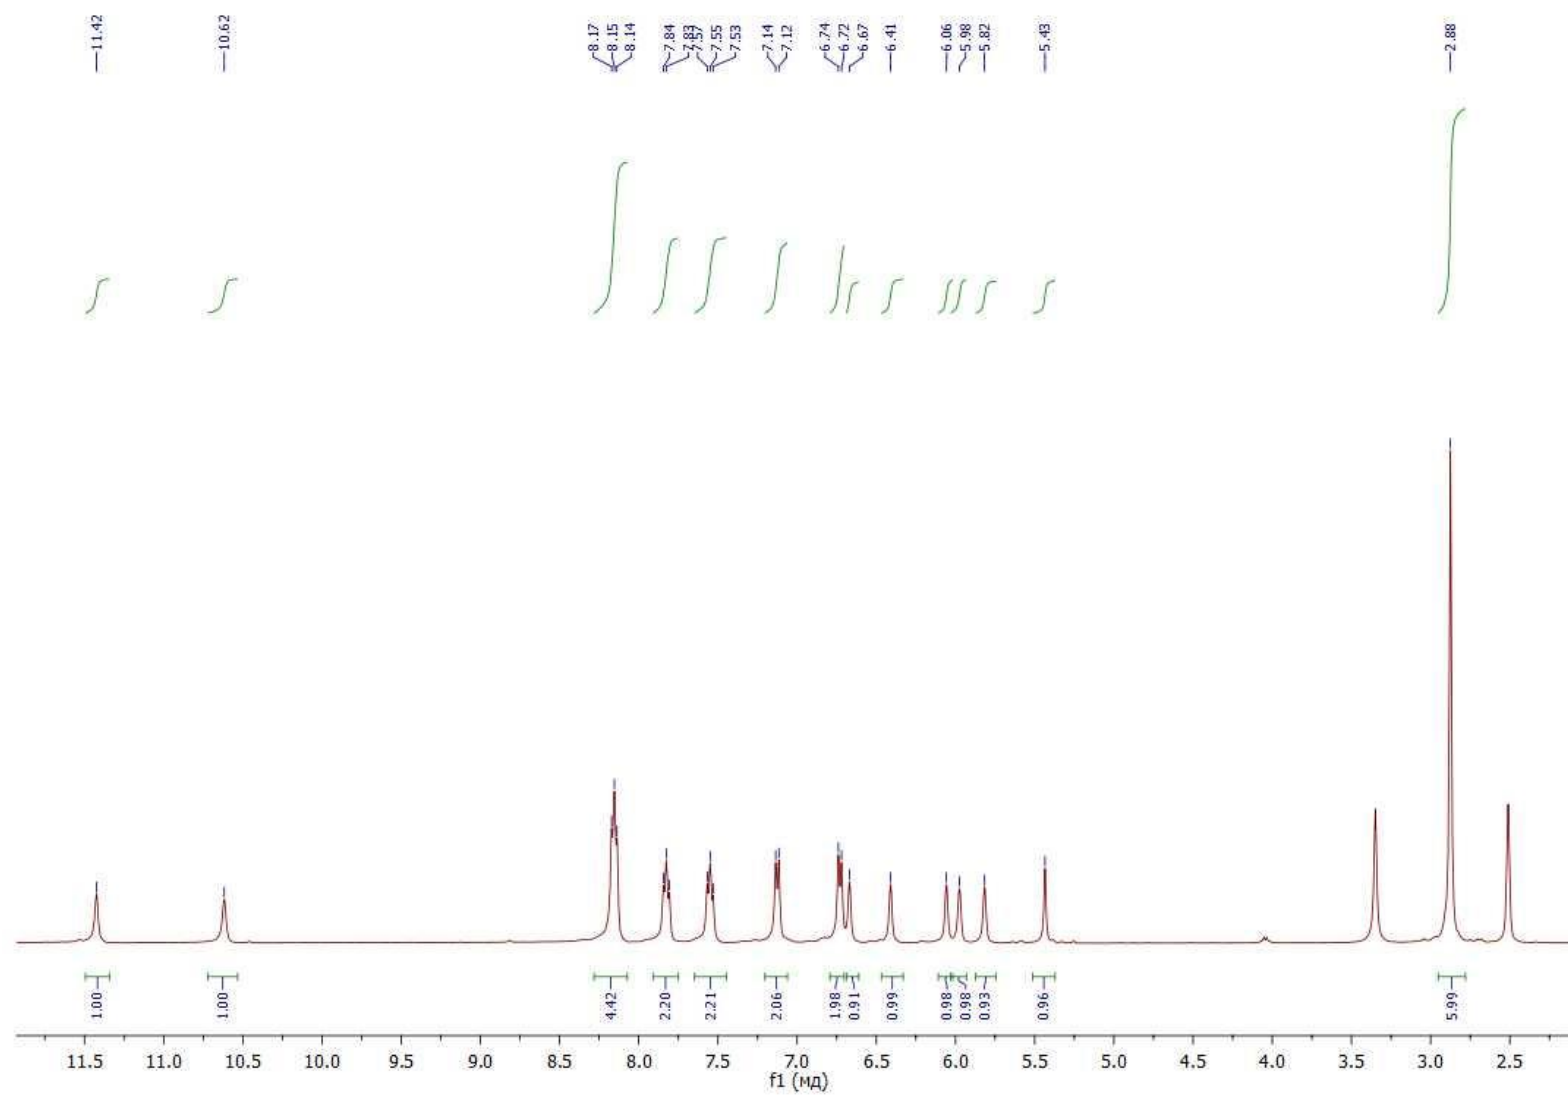

Figure S11.  $^1\text{H}$  NMR Spectrum of 5f

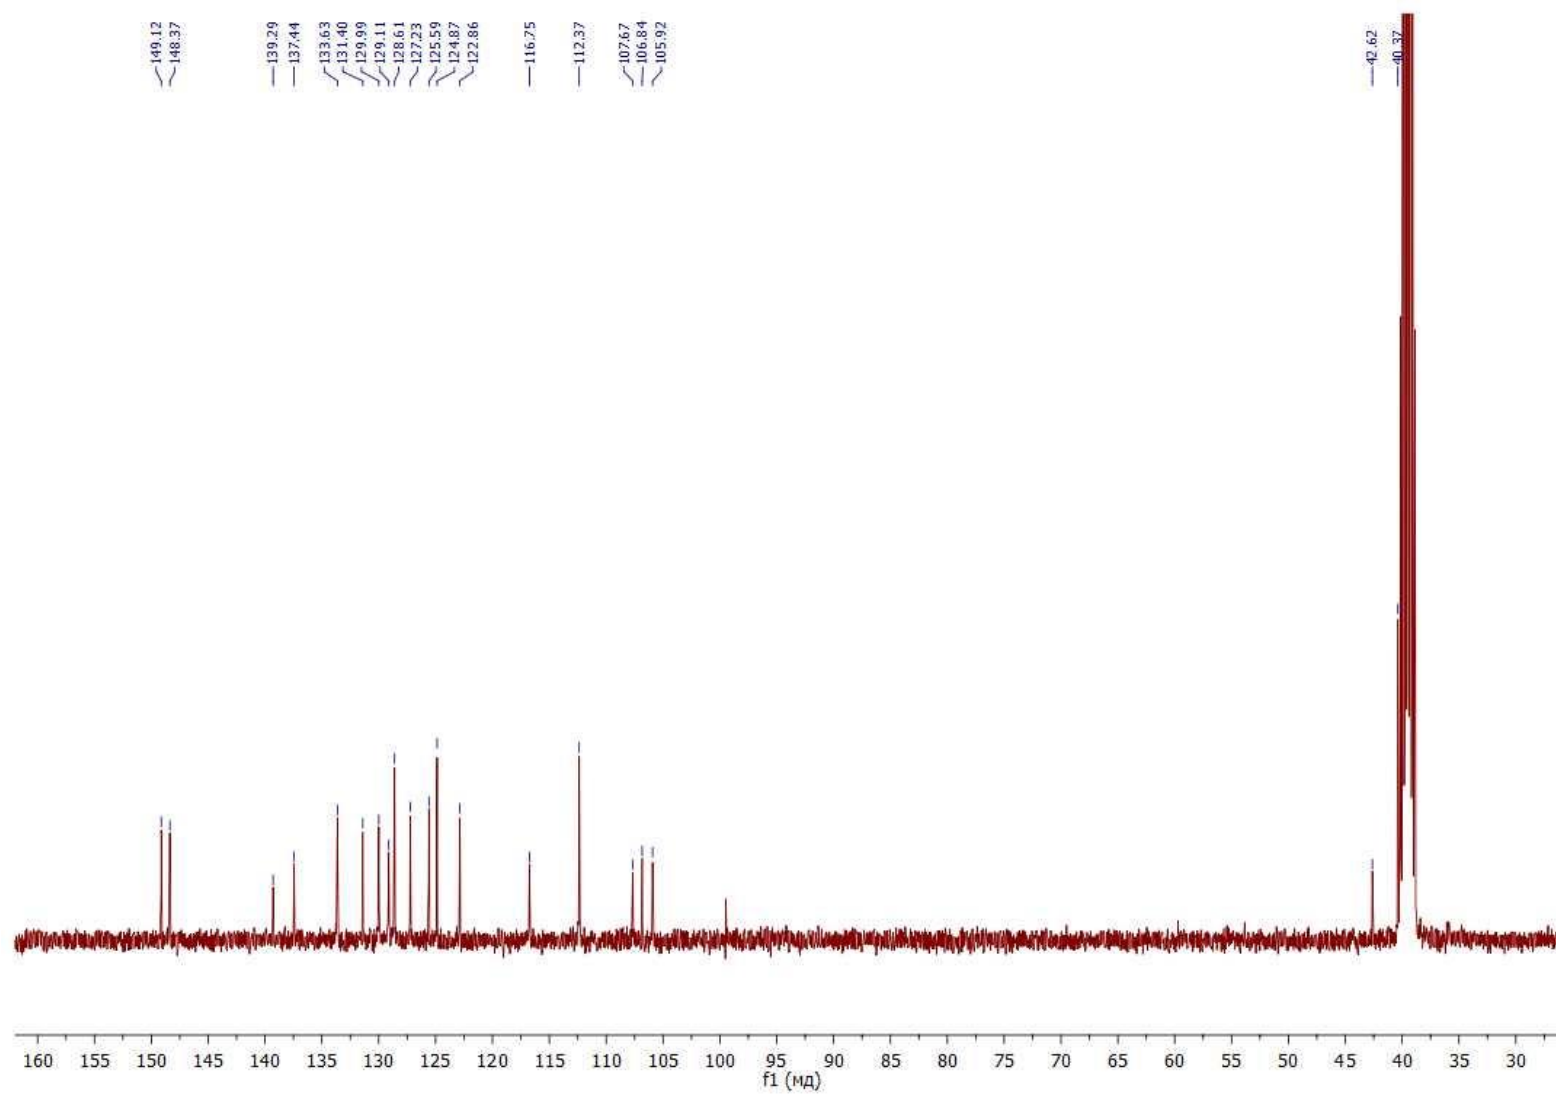

Figure S12.  $^{13}\text{C}$  NMR Spectrum of 5f

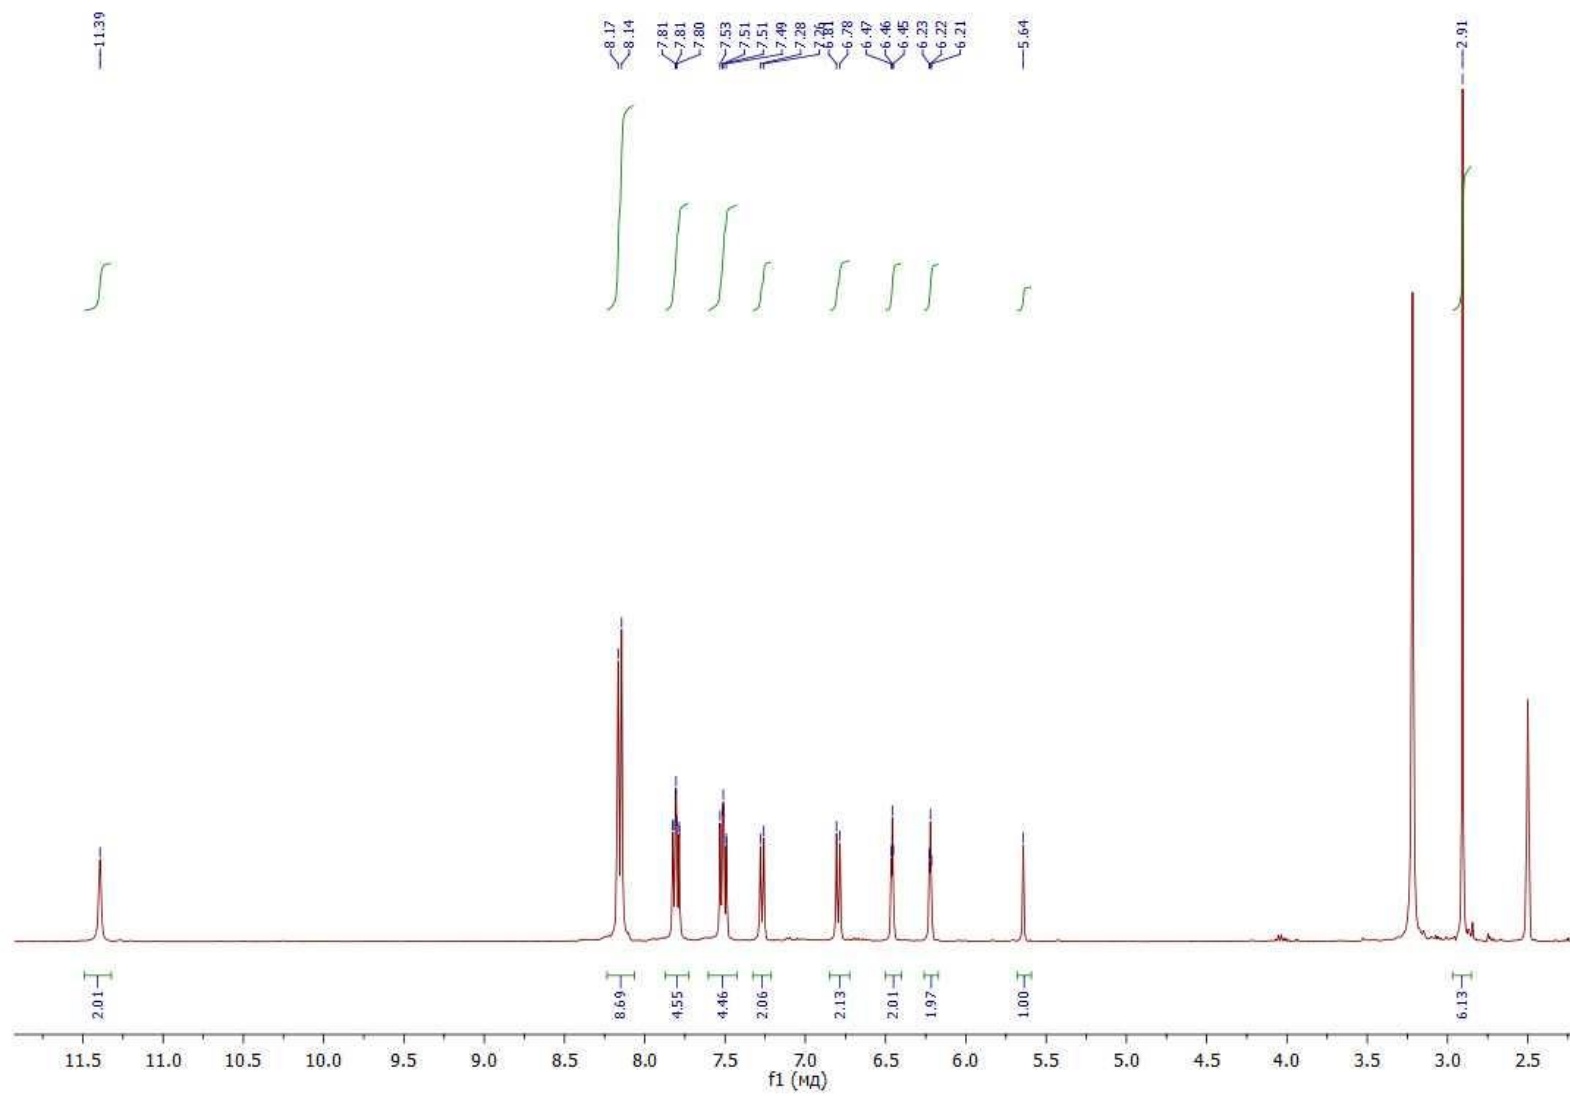

Figure S13.  $^1\text{H}$  NMR Spectrum of 5g

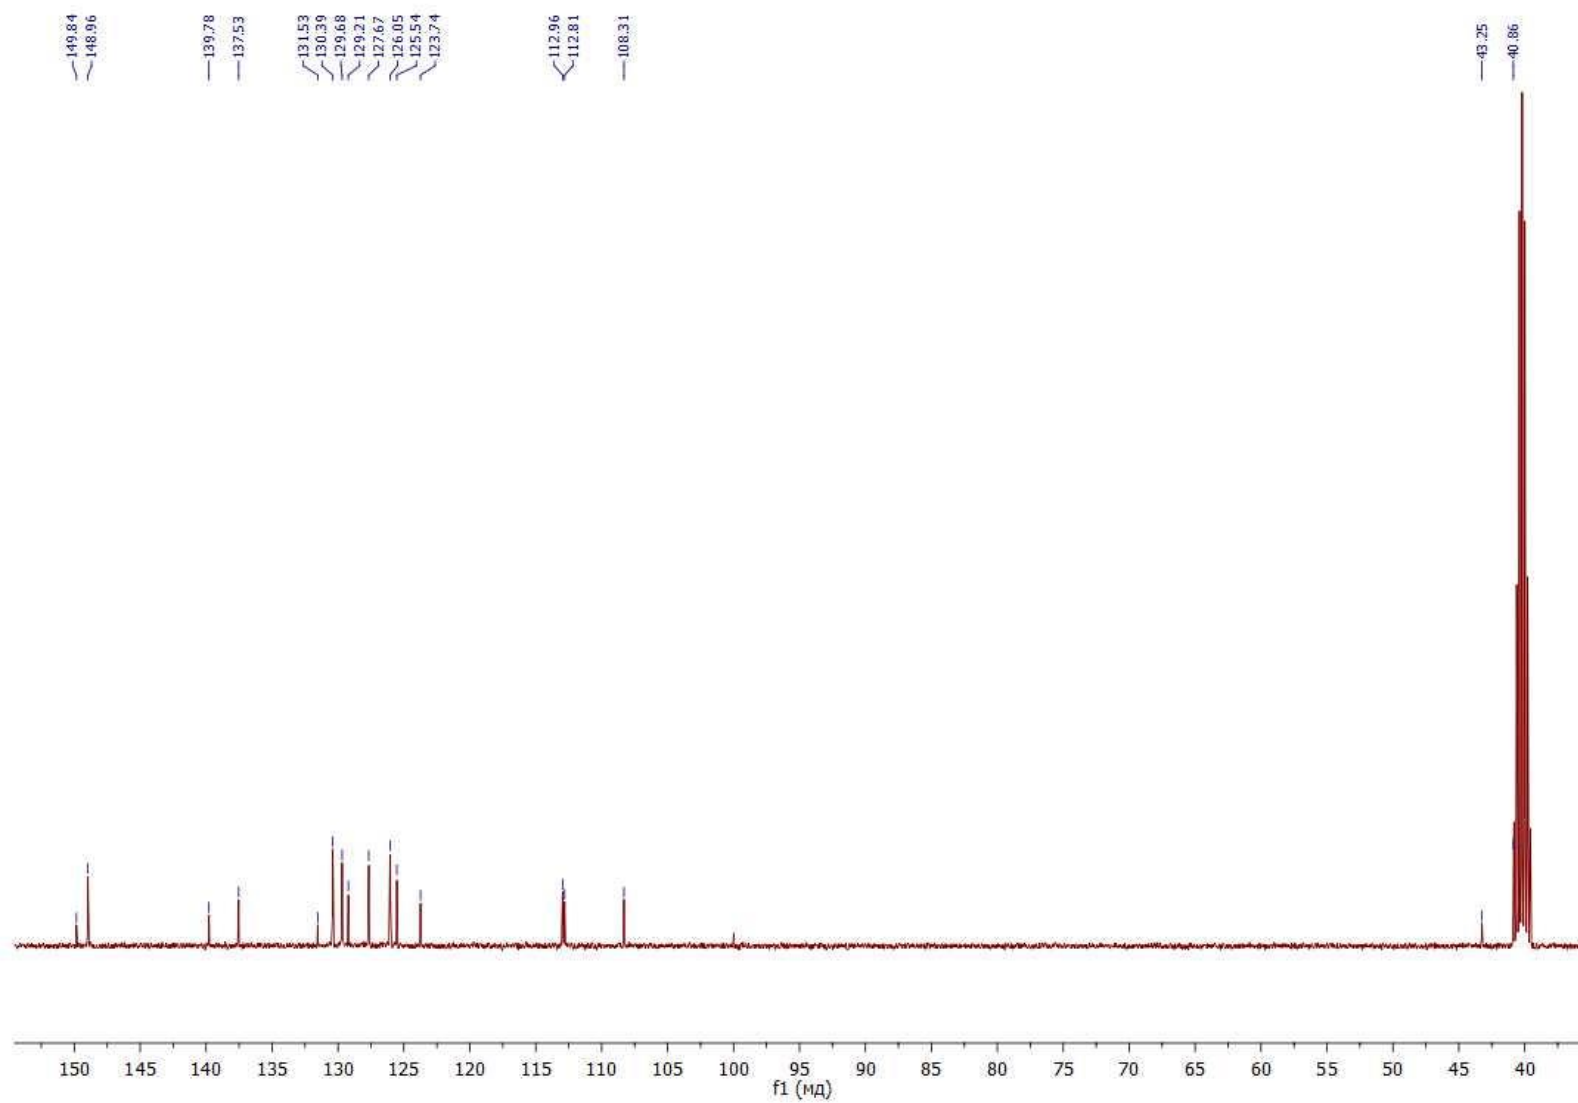

Figure S14.  $^{13}\text{C}$  NMR Spectrum of 5g

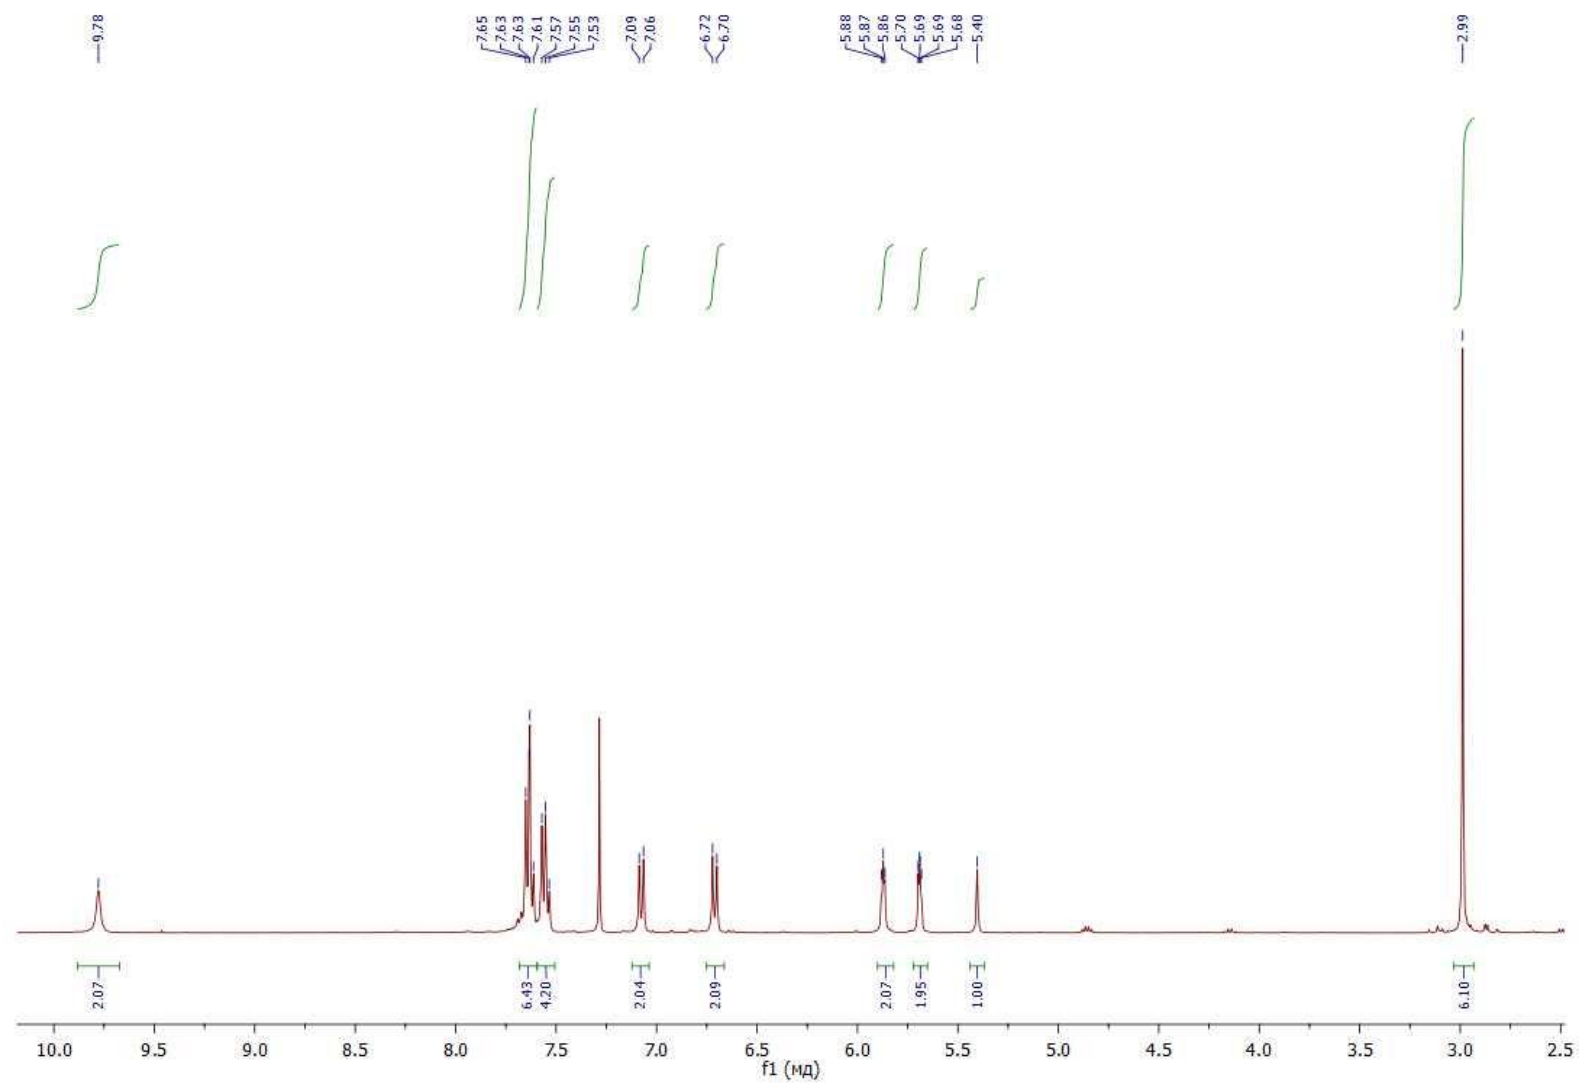

Figure S15. <sup>1</sup>H NMR Spectrum of 5h



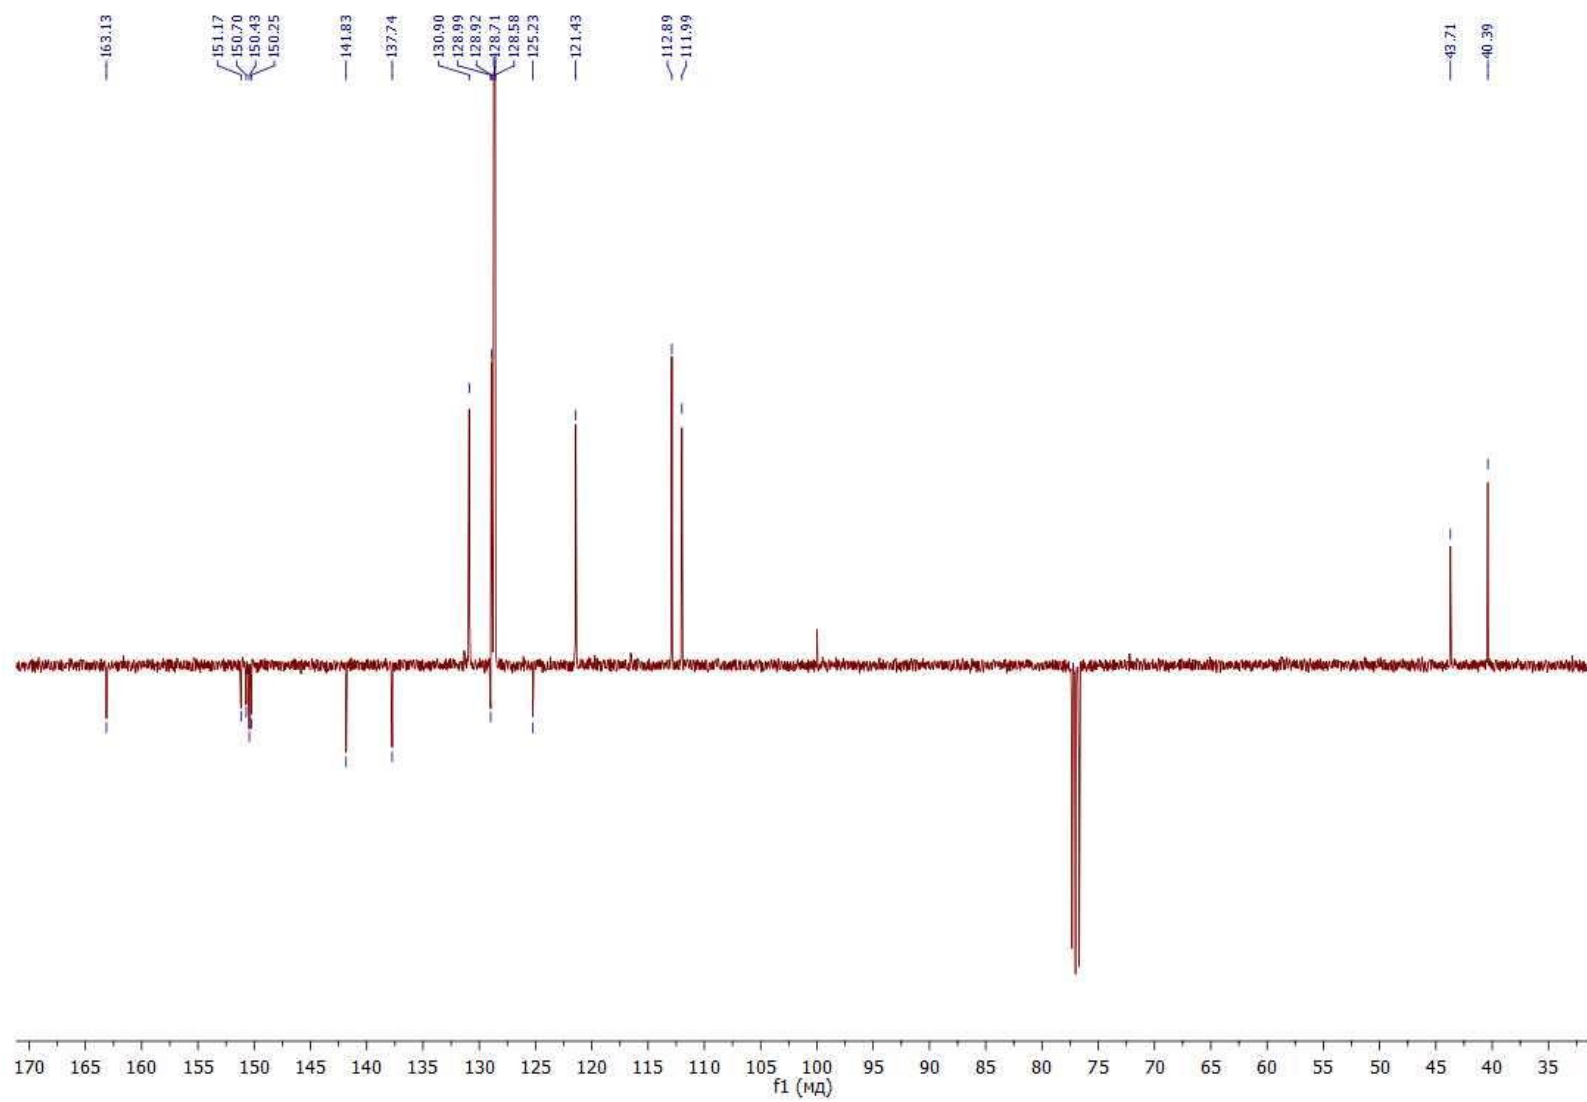

Figure S16.  $^{13}\text{C}$  NMR Spectrum of 5h

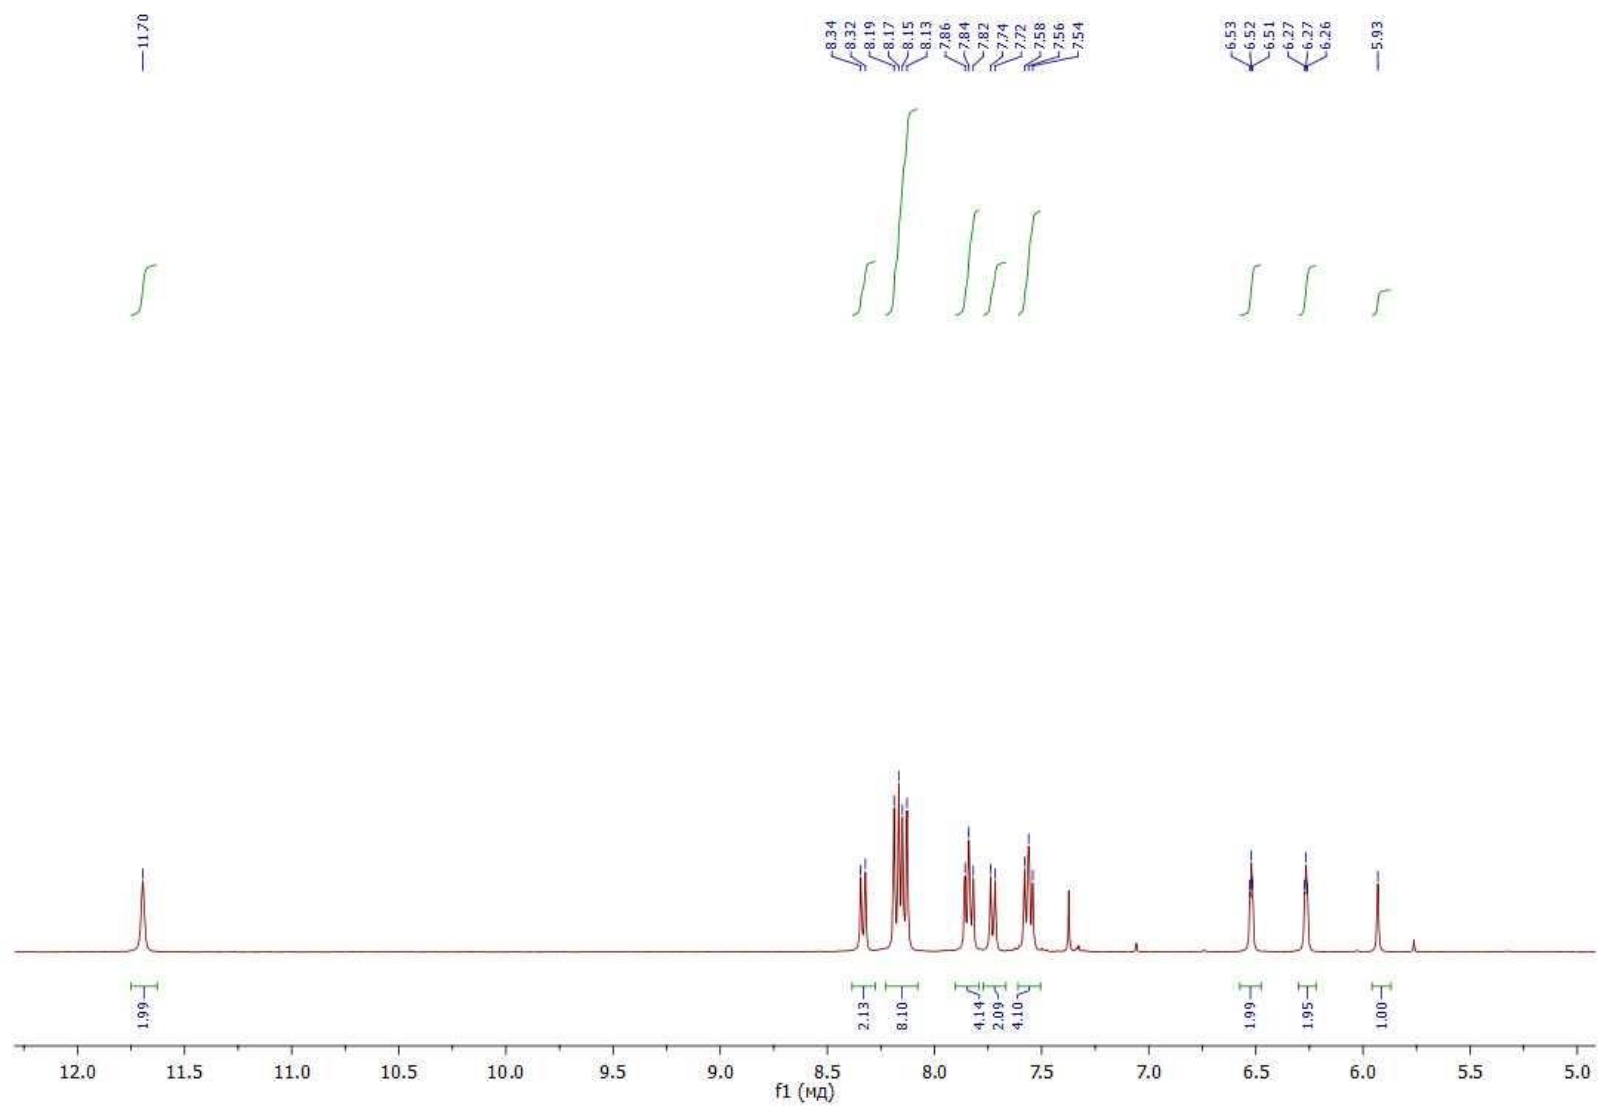

Figure S17.  $^1\text{H}$  NMR Spectrum of 5i

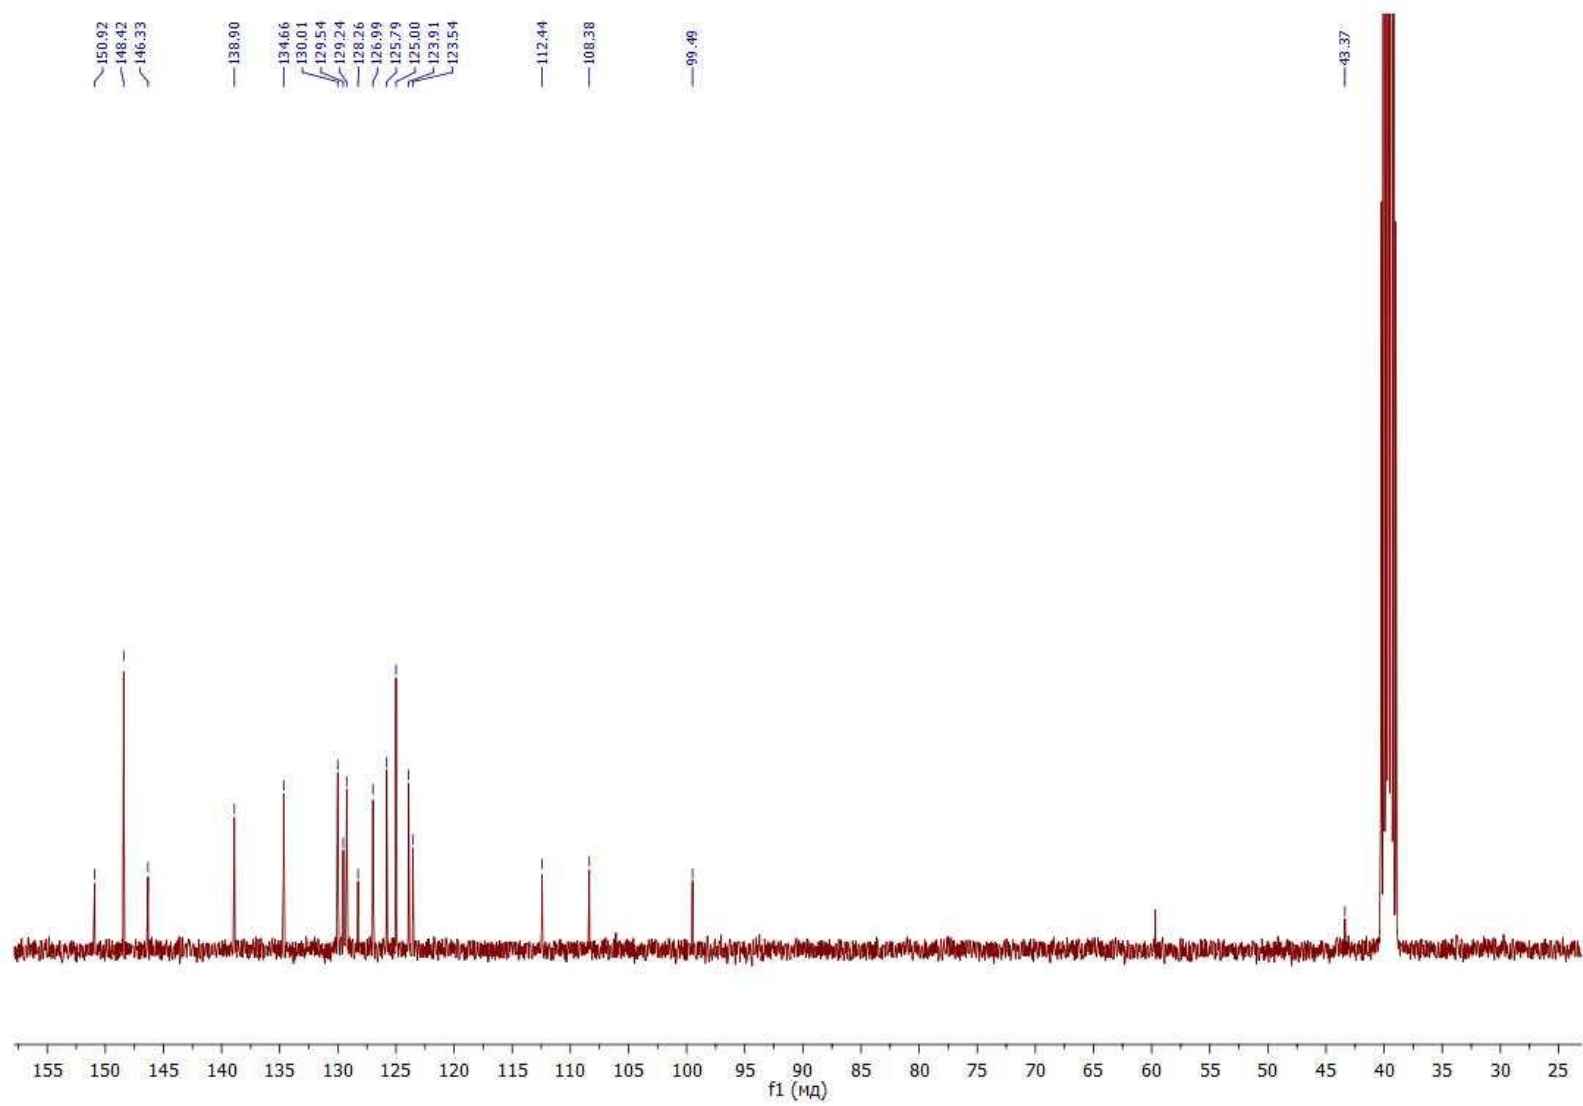

Figure S18. <sup>13</sup>C NMR Spectrum of 5i

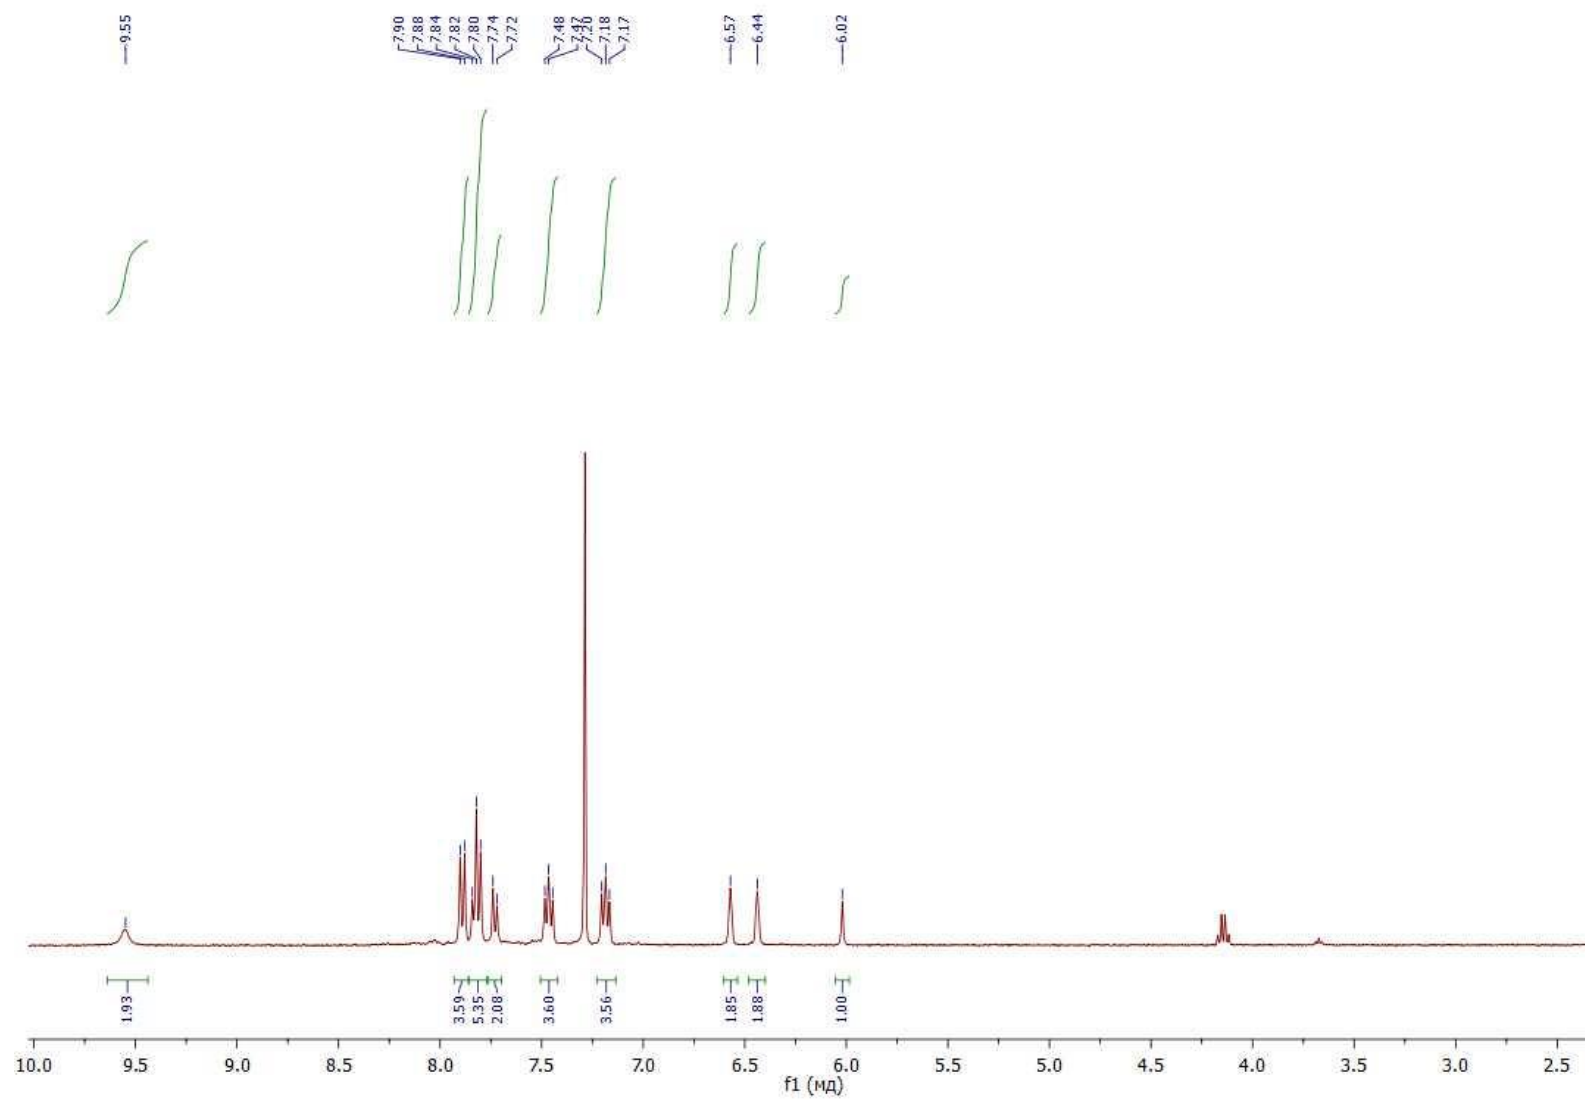

Figure S19. <sup>1</sup>H NMR Spectrum of 5j

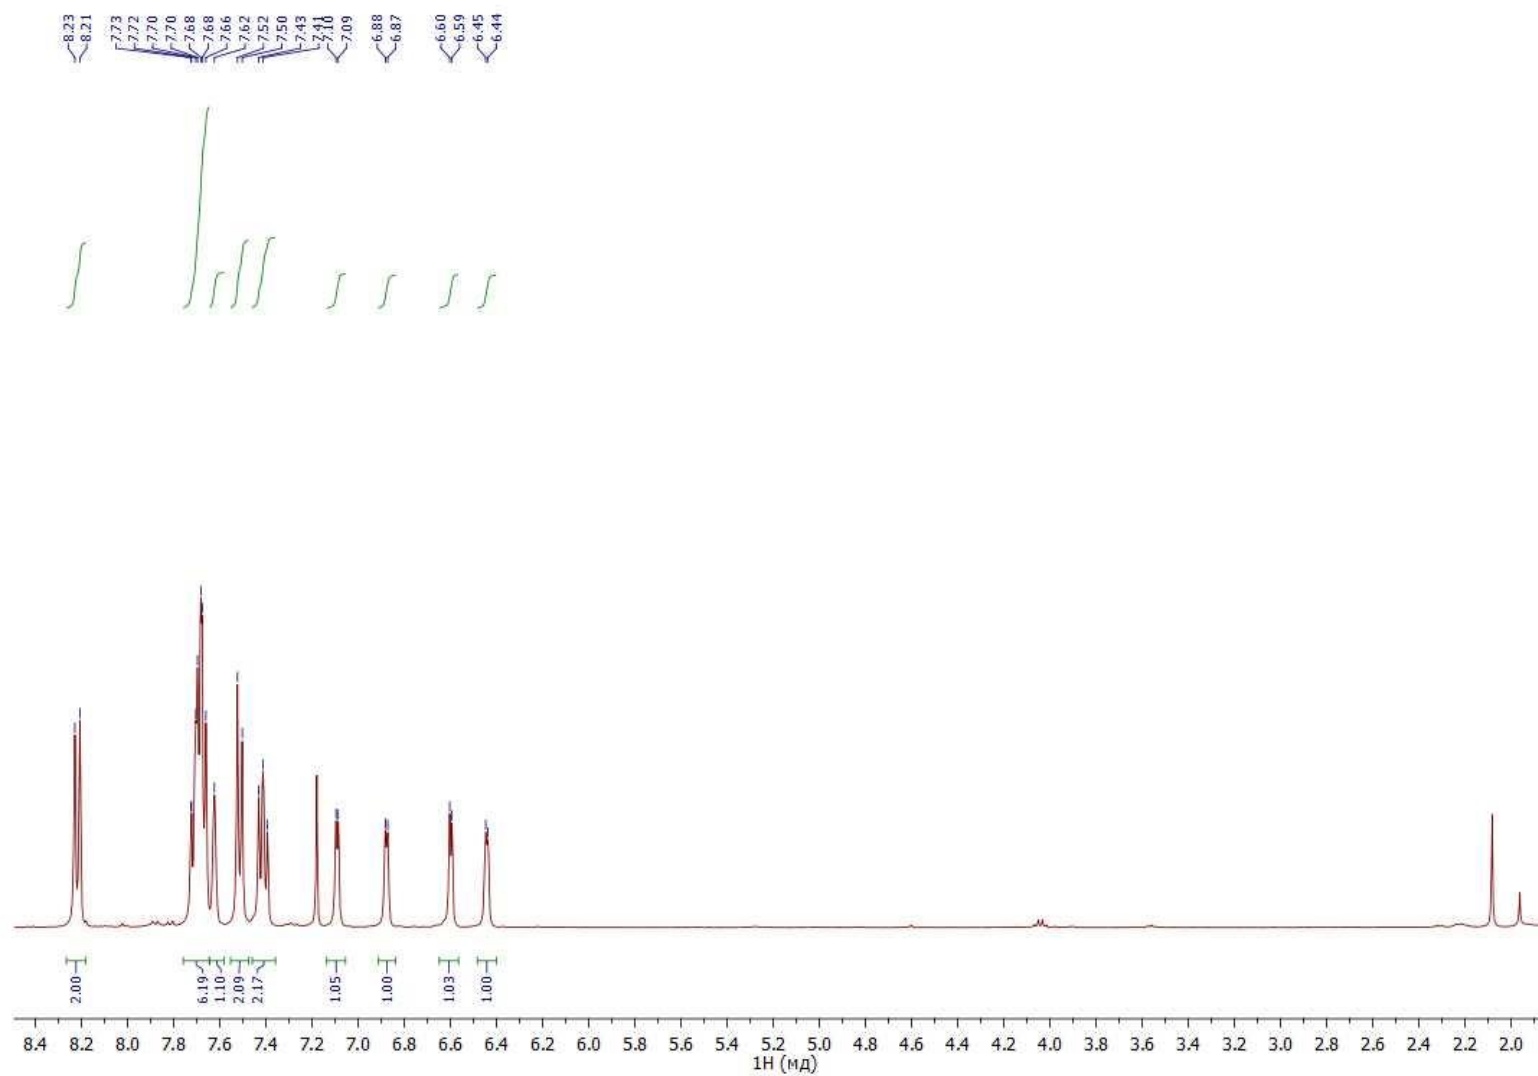

Figure S20. <sup>1</sup>H NMR Spectrum of 6a

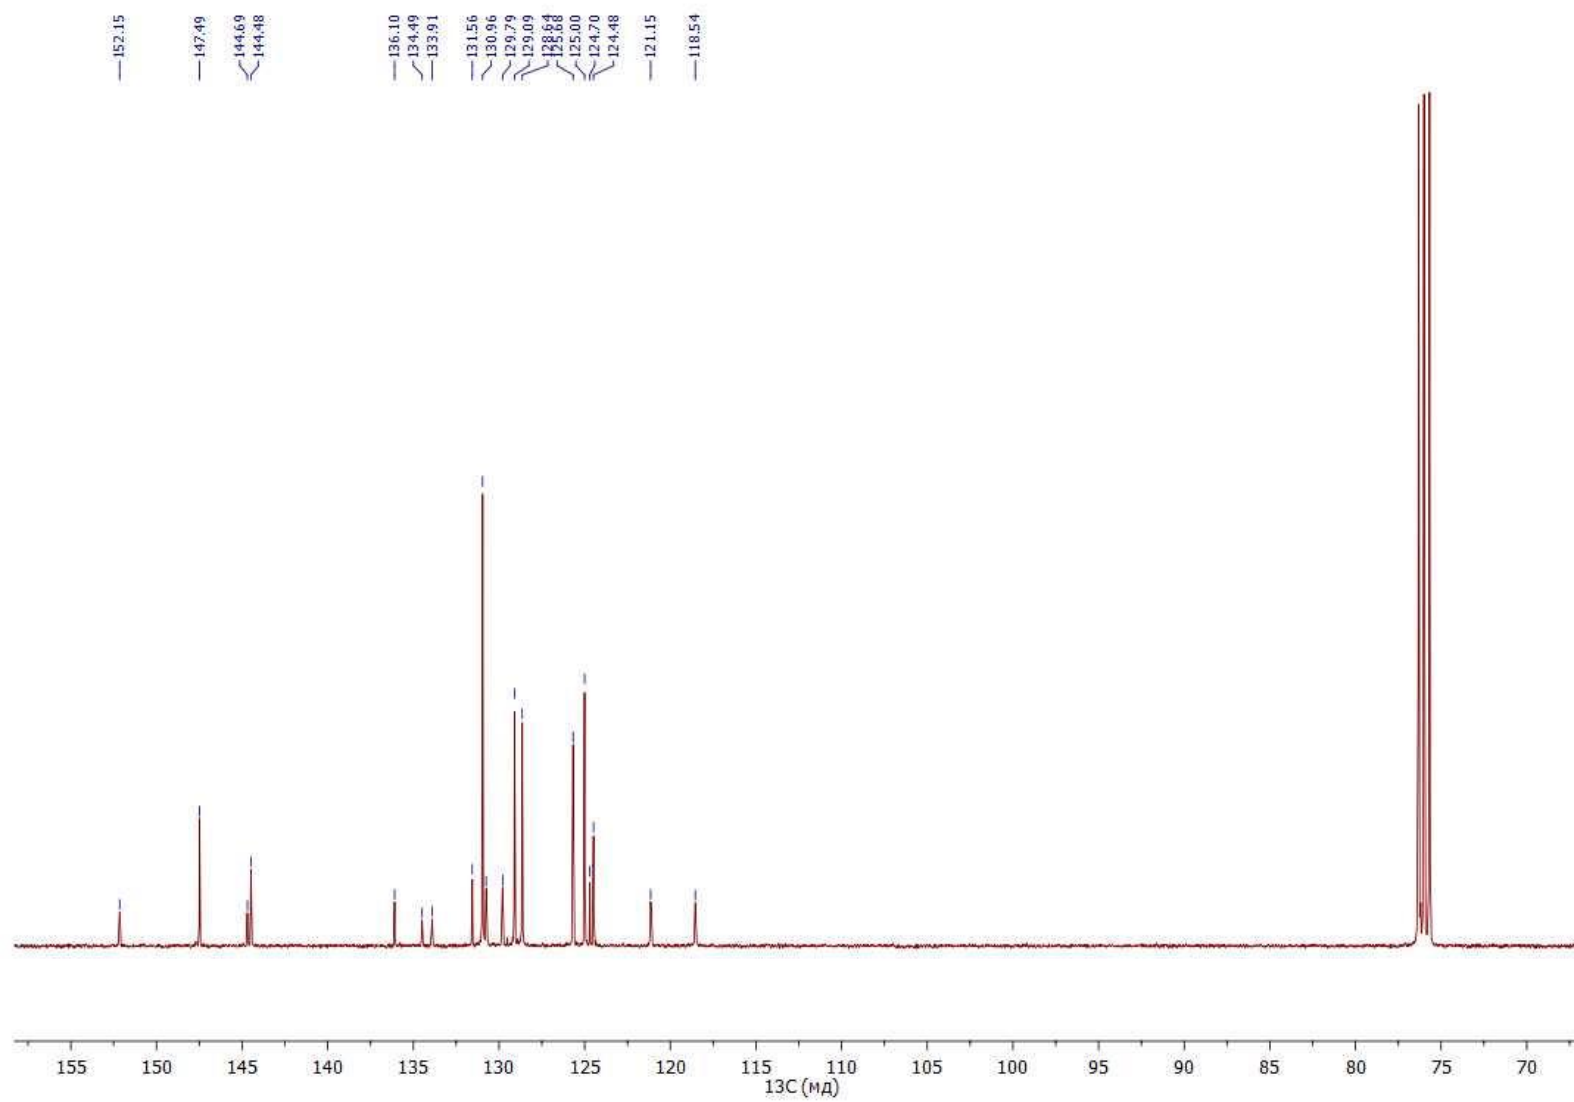

Figure S21.  $^{13}\text{C}$  NMR Spectrum of 6a

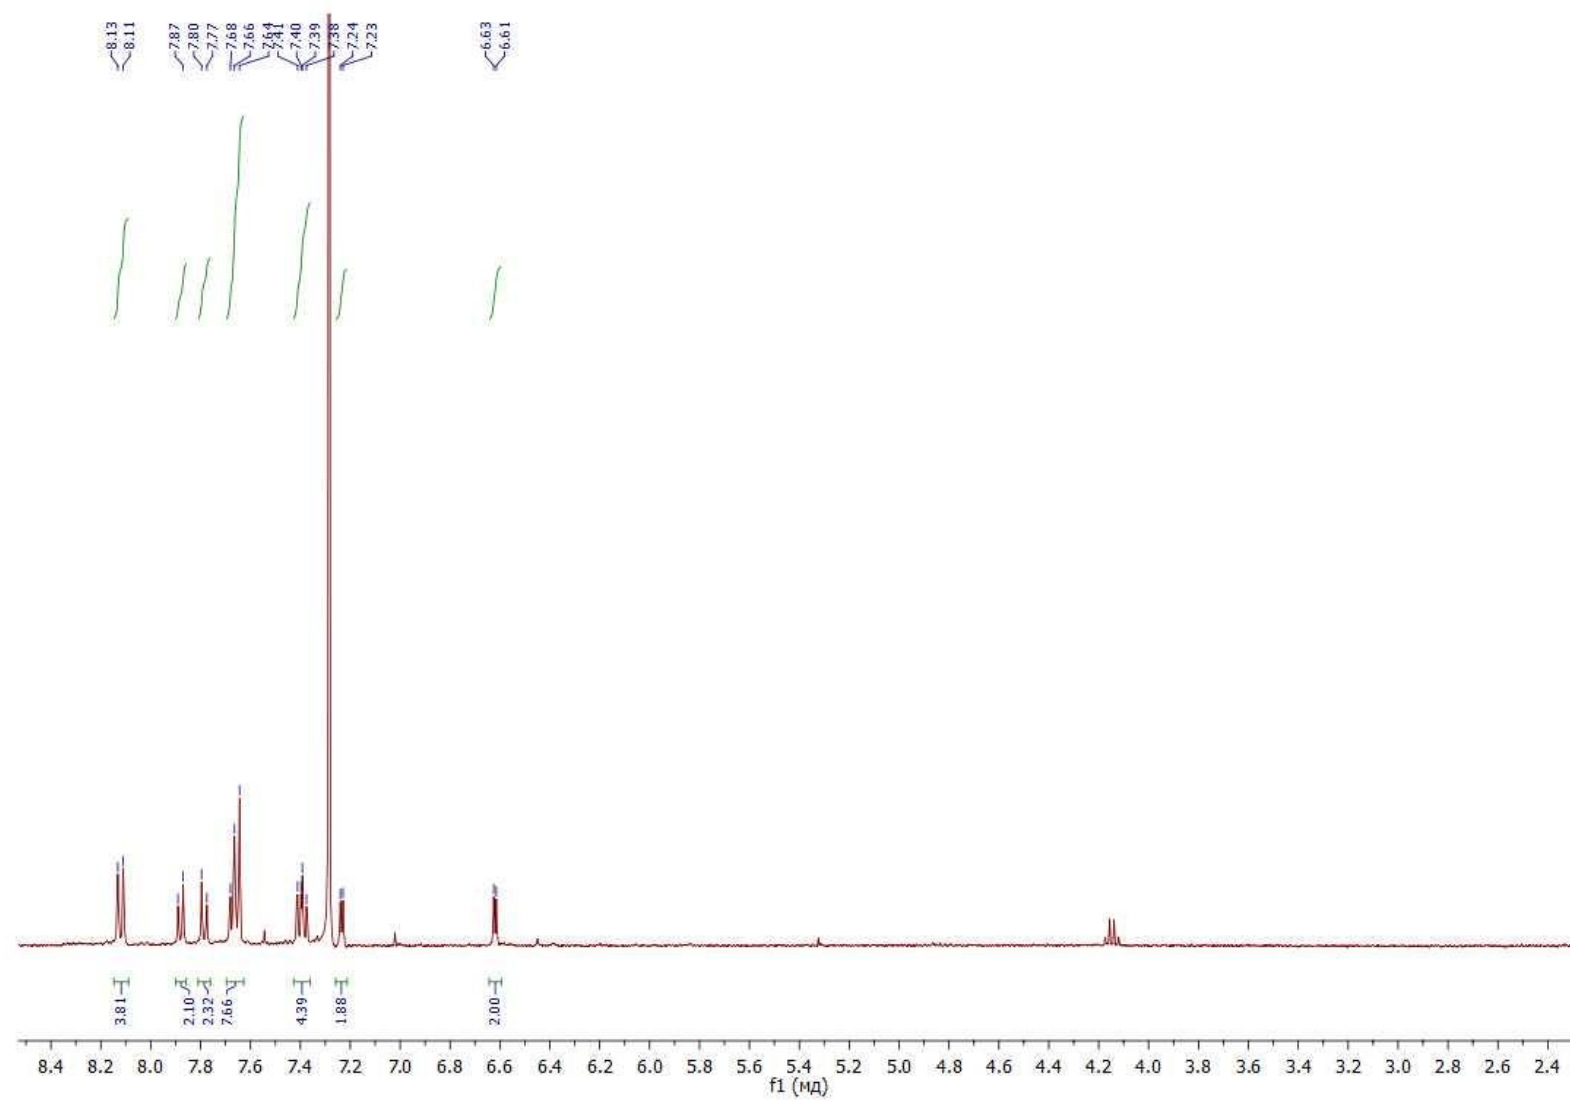

Figure S22. <sup>1</sup>H NMR Spectrum of 6b

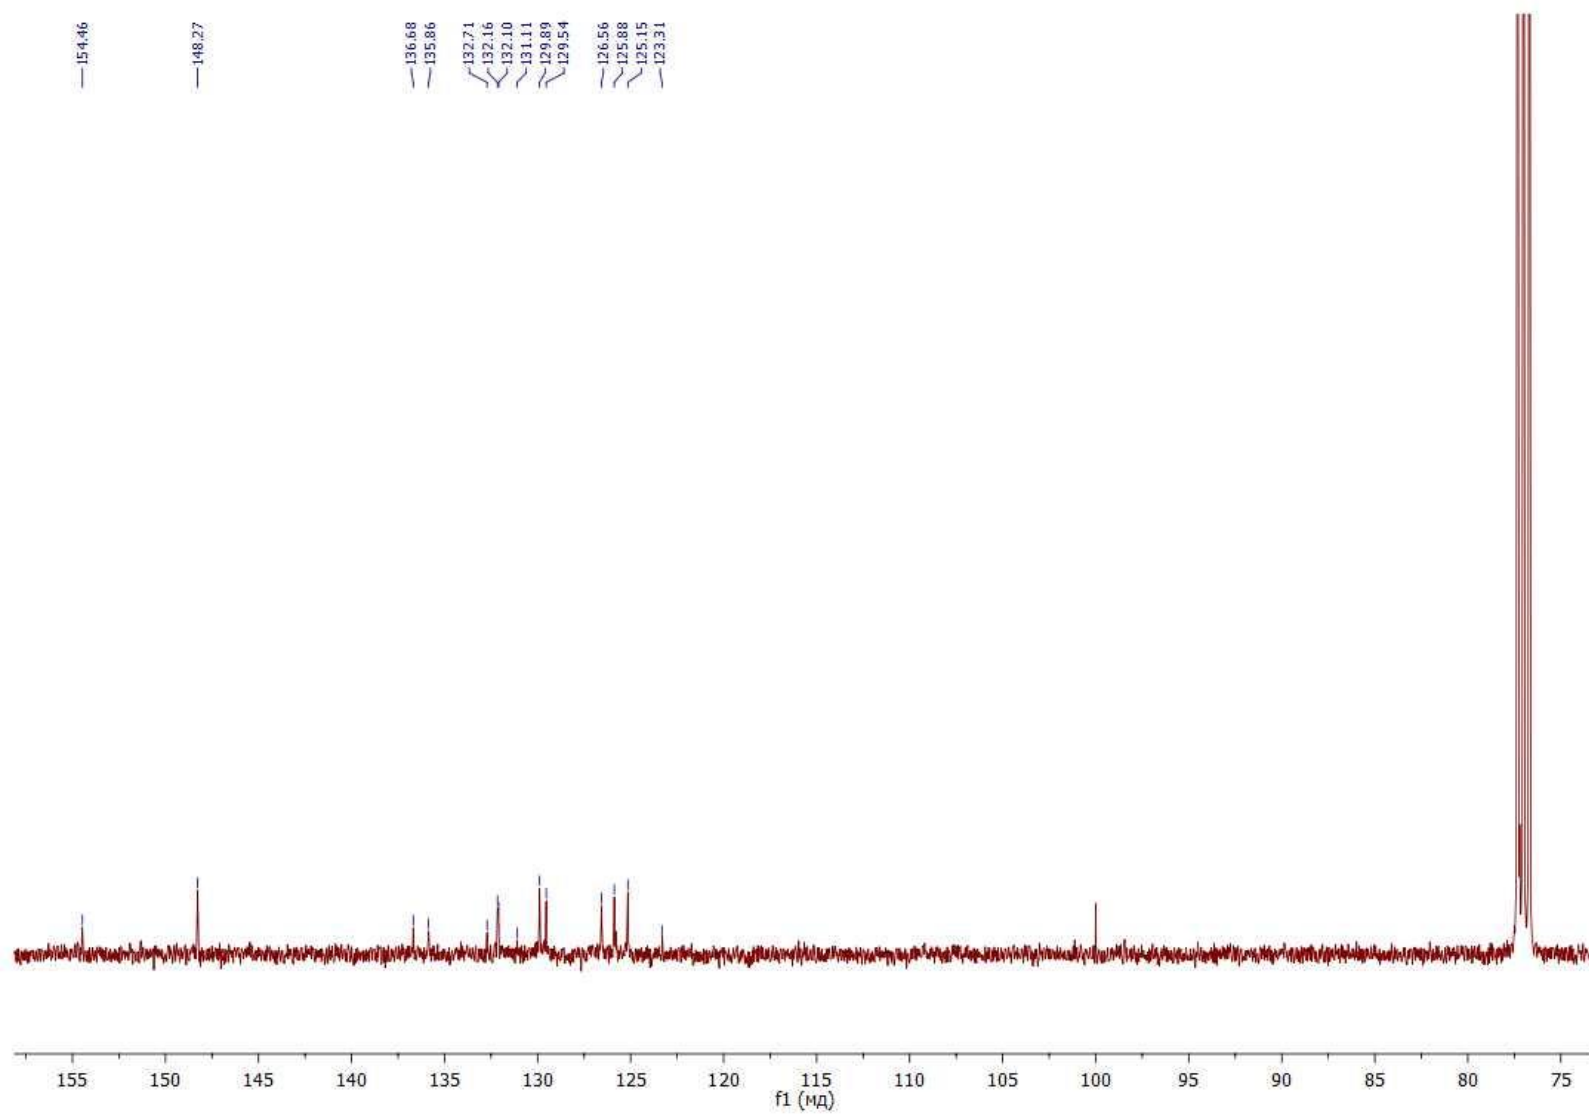

Figure S23.  $^{13}\text{C}$  NMR Spectrum of 6b



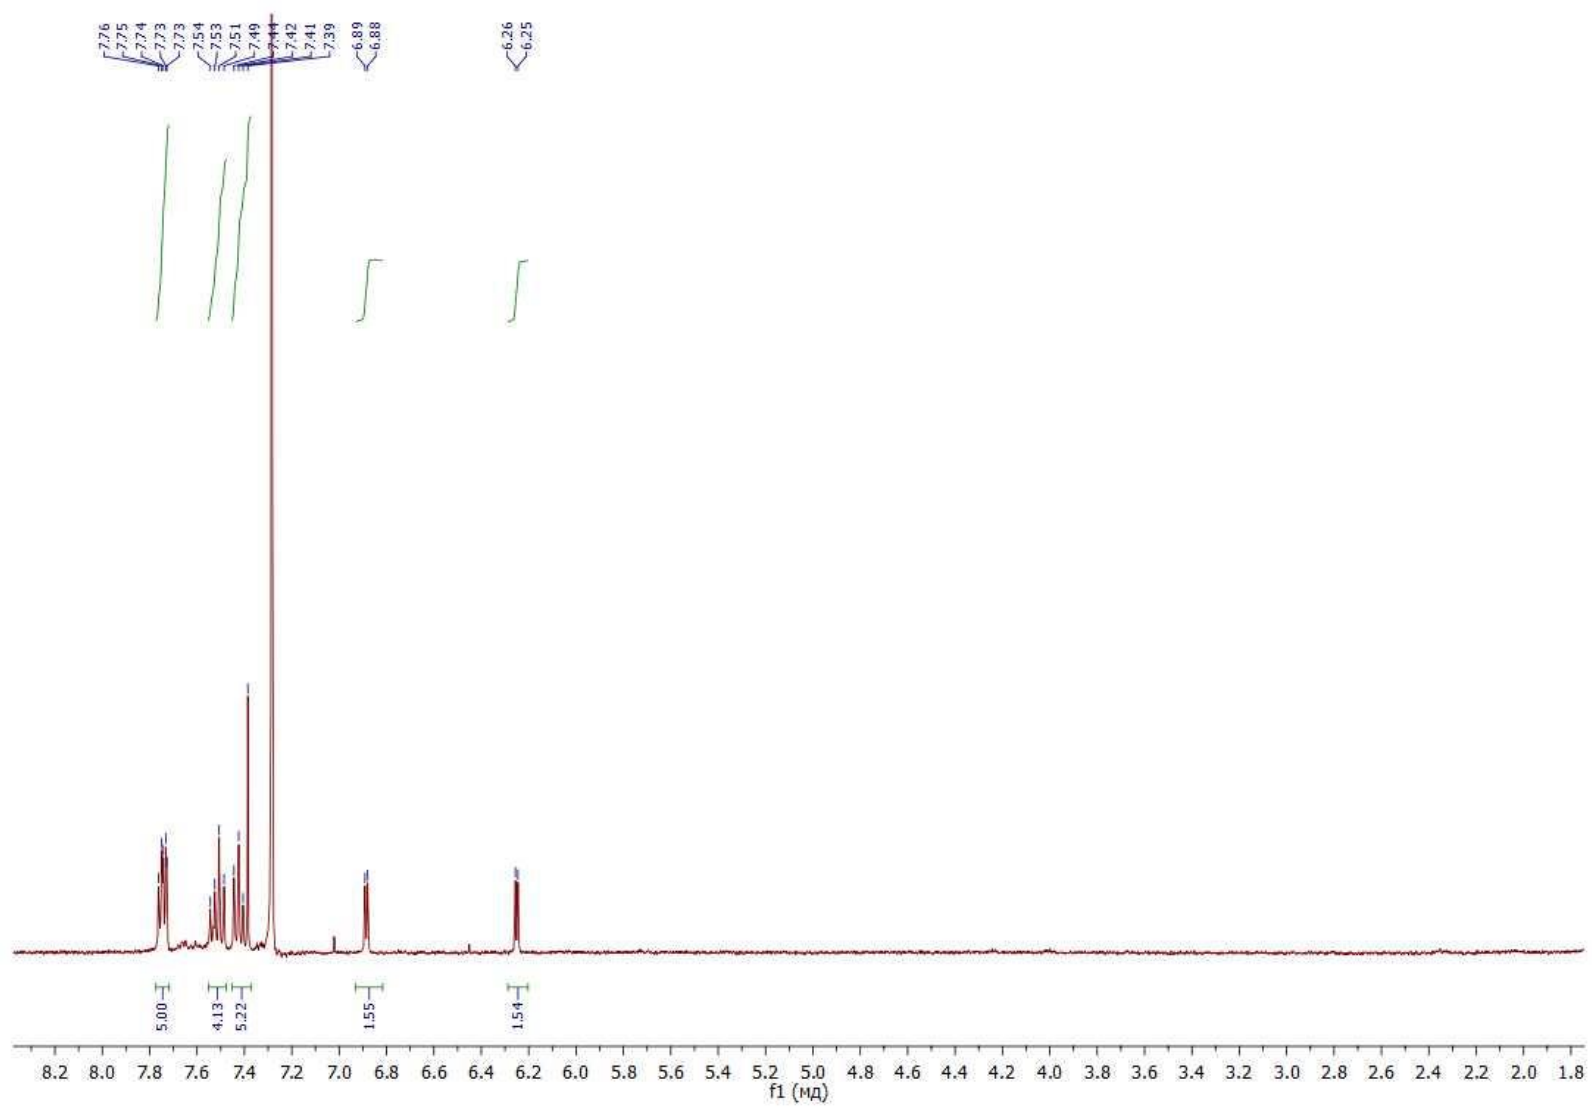

Figure S24. <sup>1</sup>H NMR Spectrum of 6c

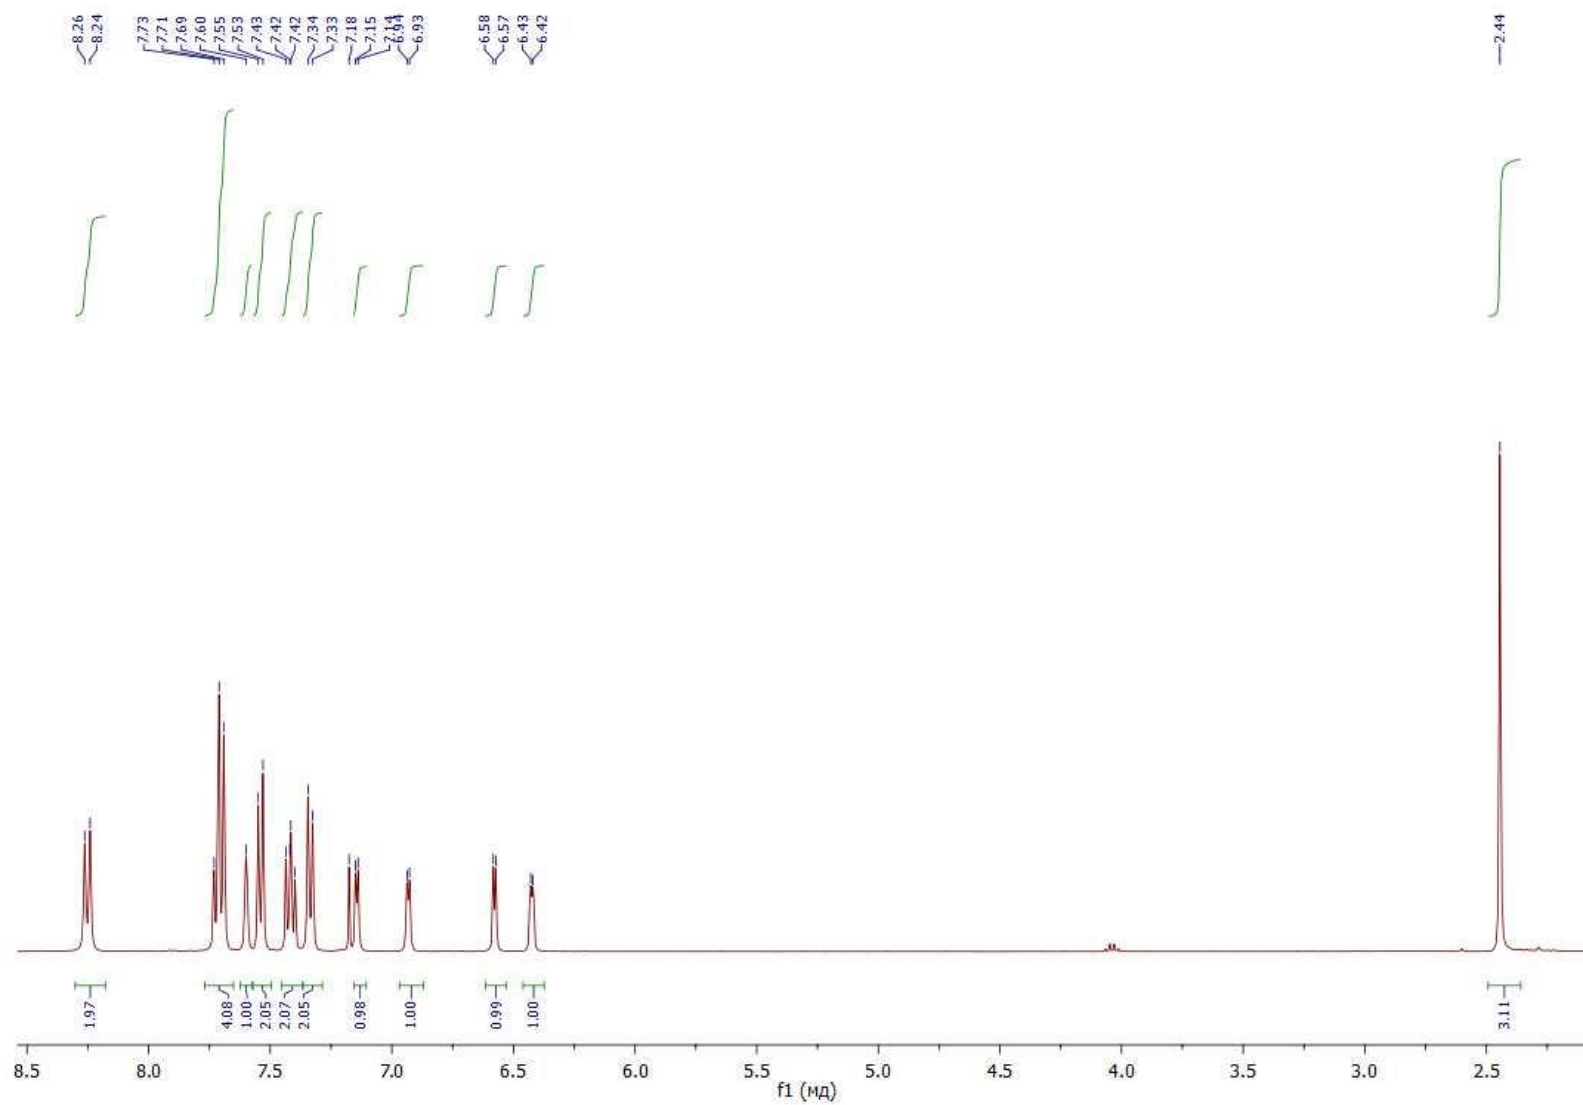

Figure S25.  $^1\text{H}$  NMR Spectrum of 6d

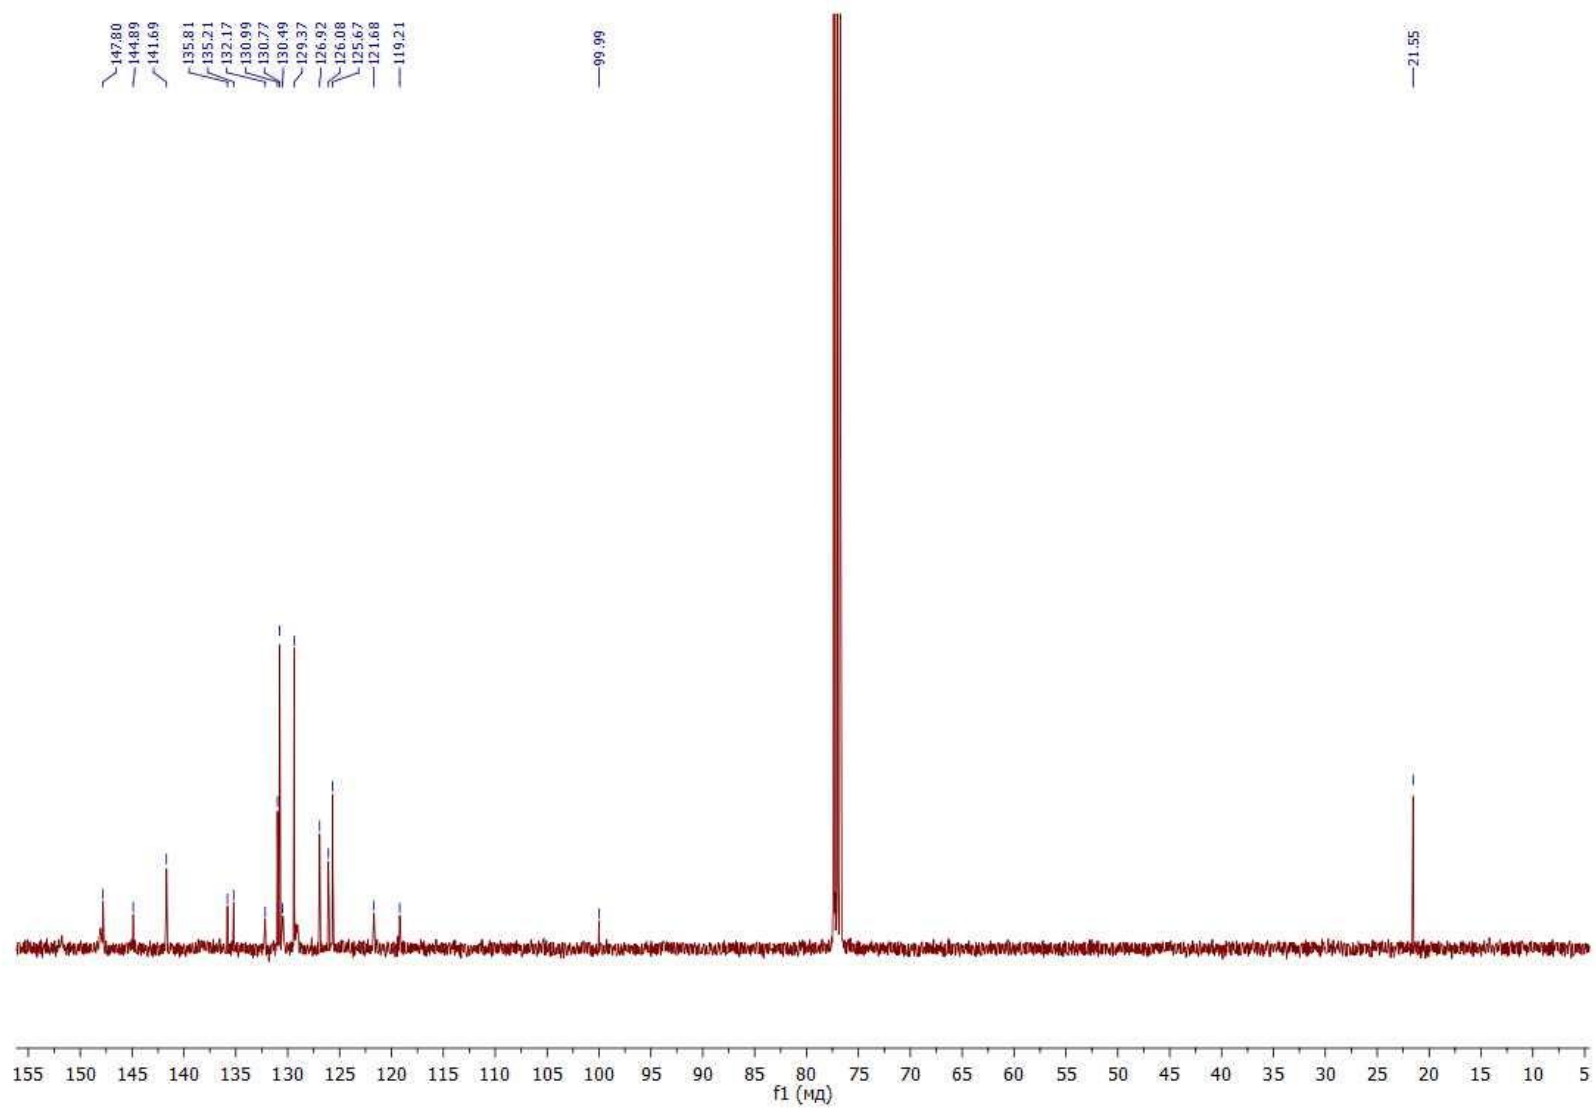

Figure S26. <sup>13</sup>C NMR Spectrum of 6d

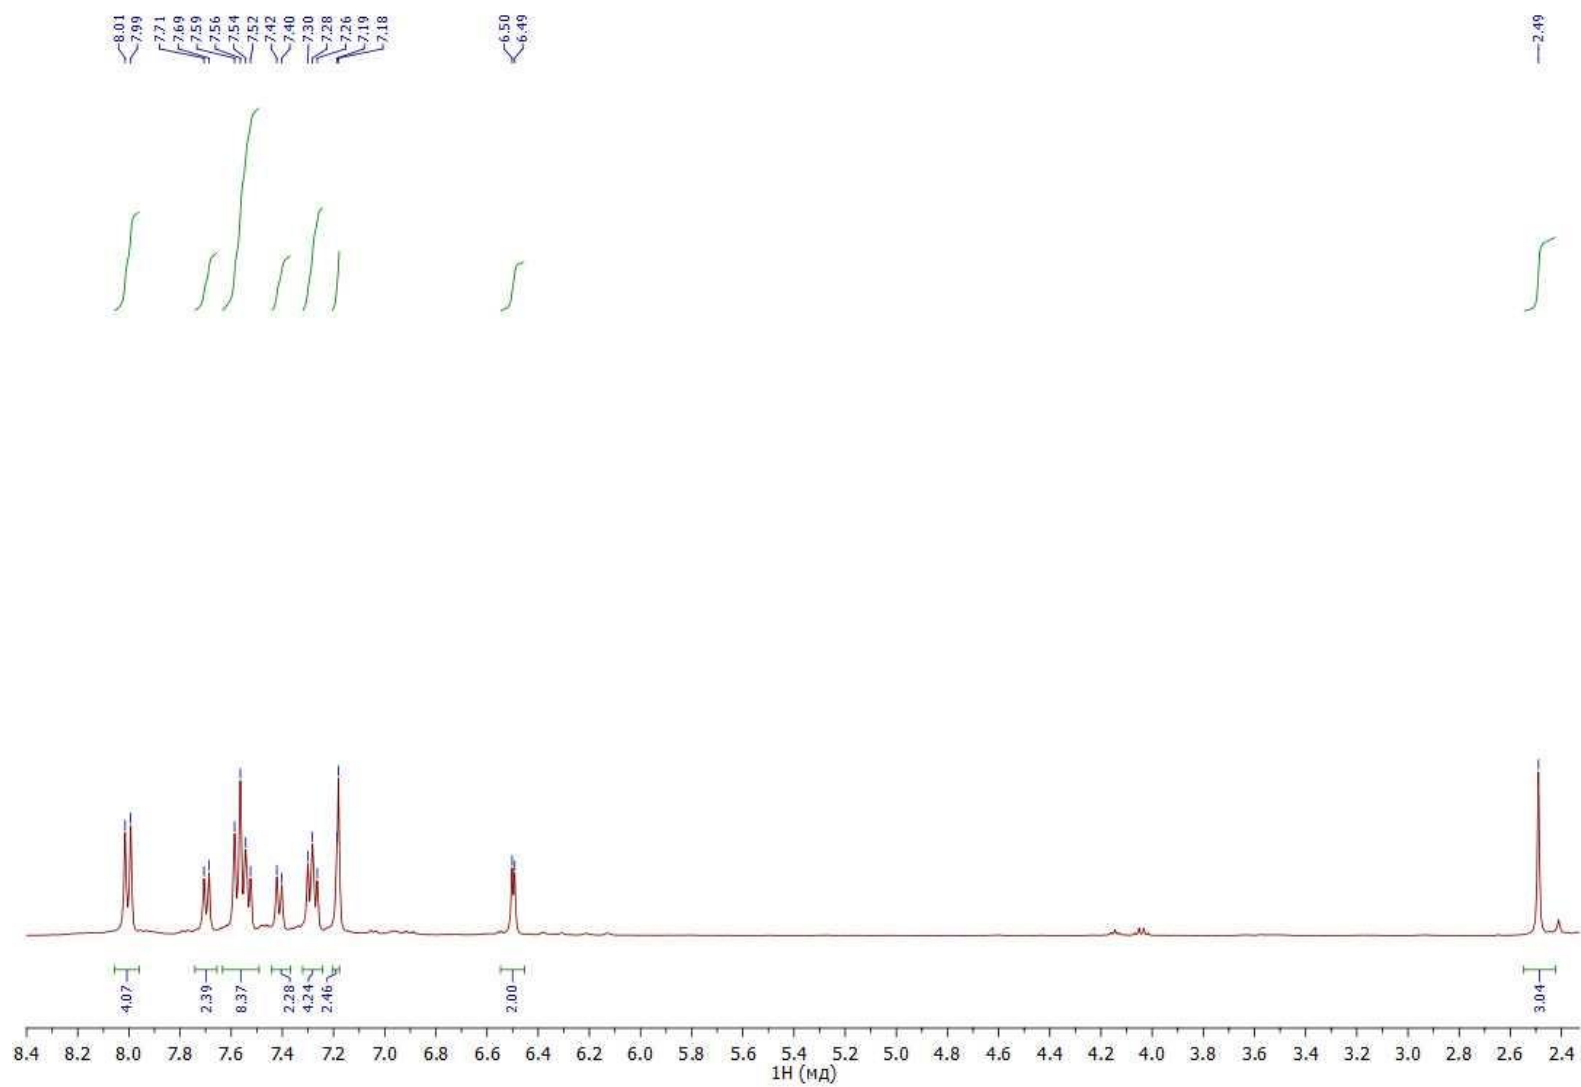

Figure S27. <sup>1</sup>H NMR Spectrum of 6e

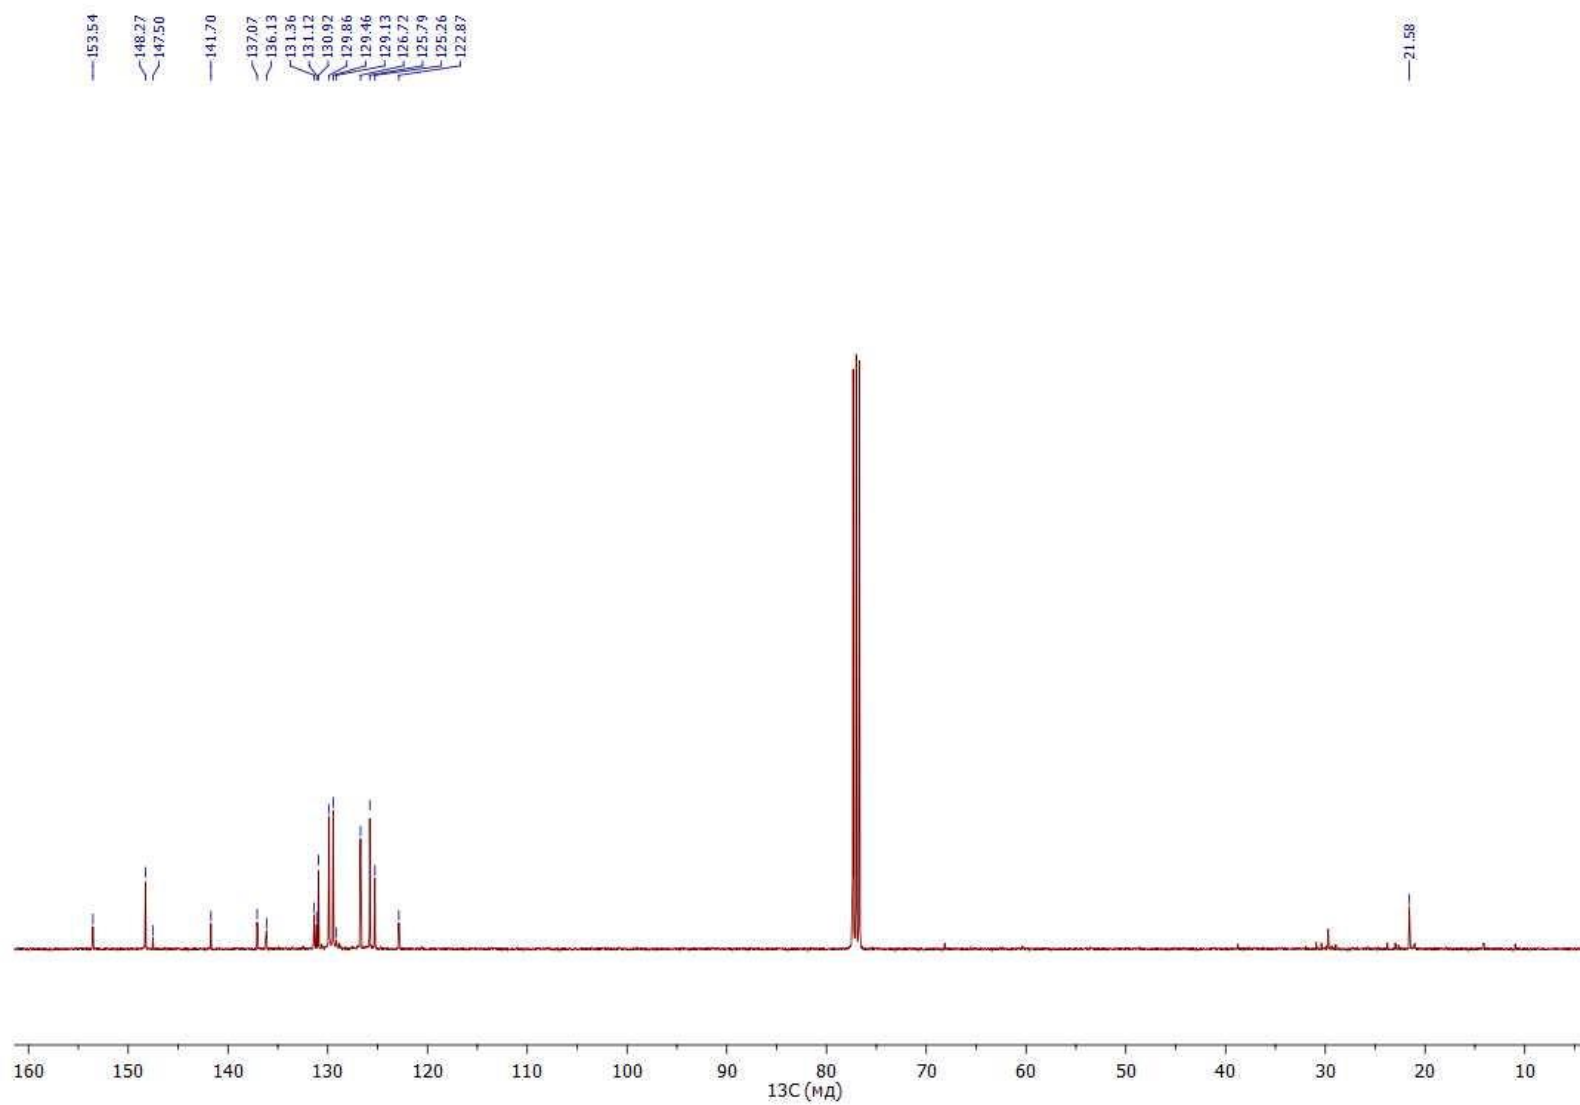

Figure S28.  $^{13}\text{C}$  NMR Spectrum of 6e

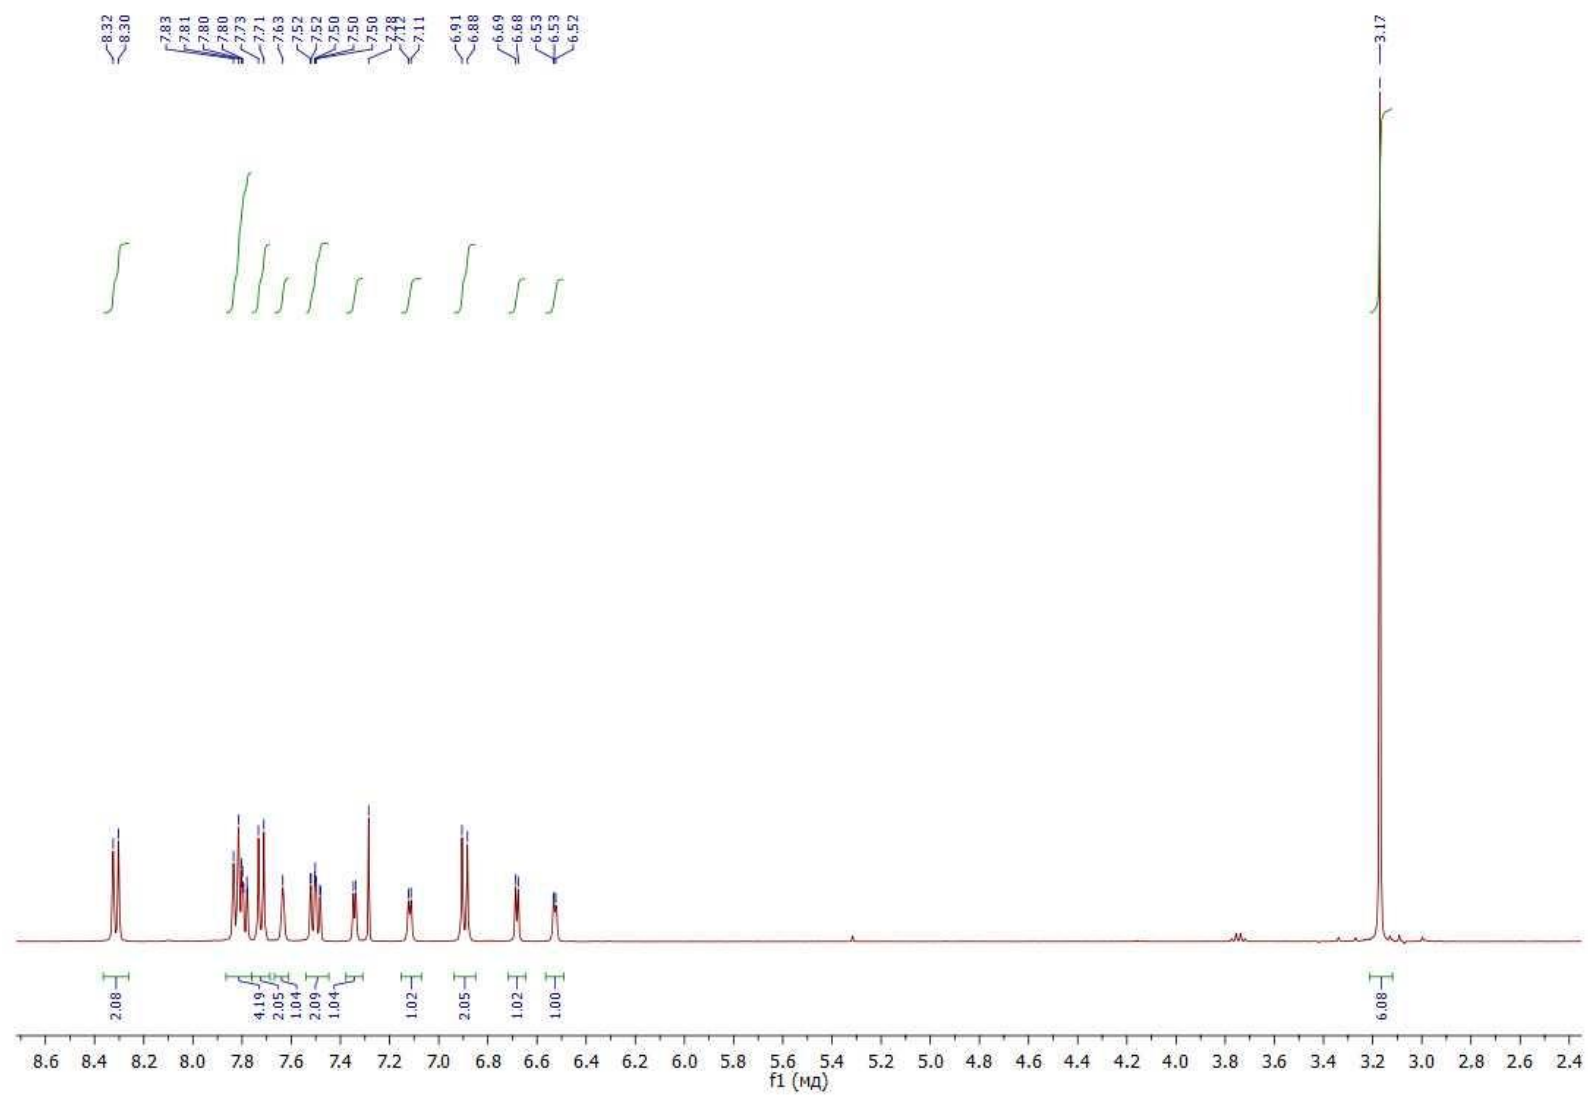

Figure S29. <sup>1</sup>H NMR Spectrum of 6f

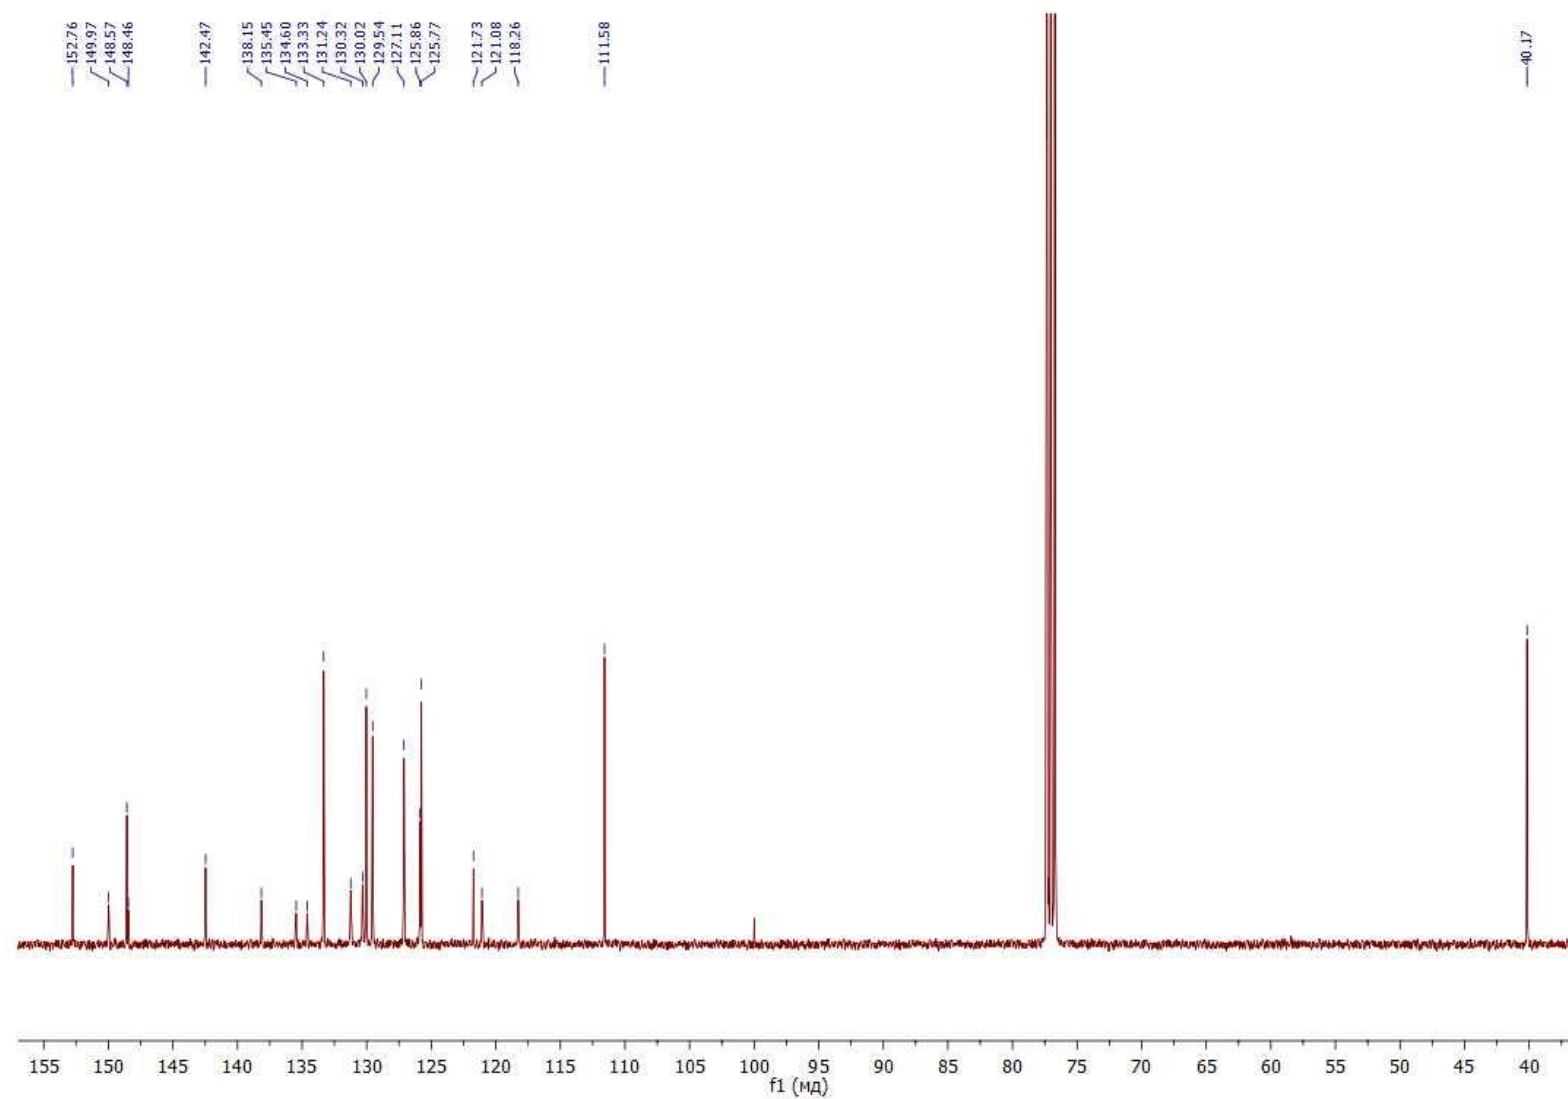

Figure S30.  $^{13}\text{C}$  NMR Spectrum of 6f

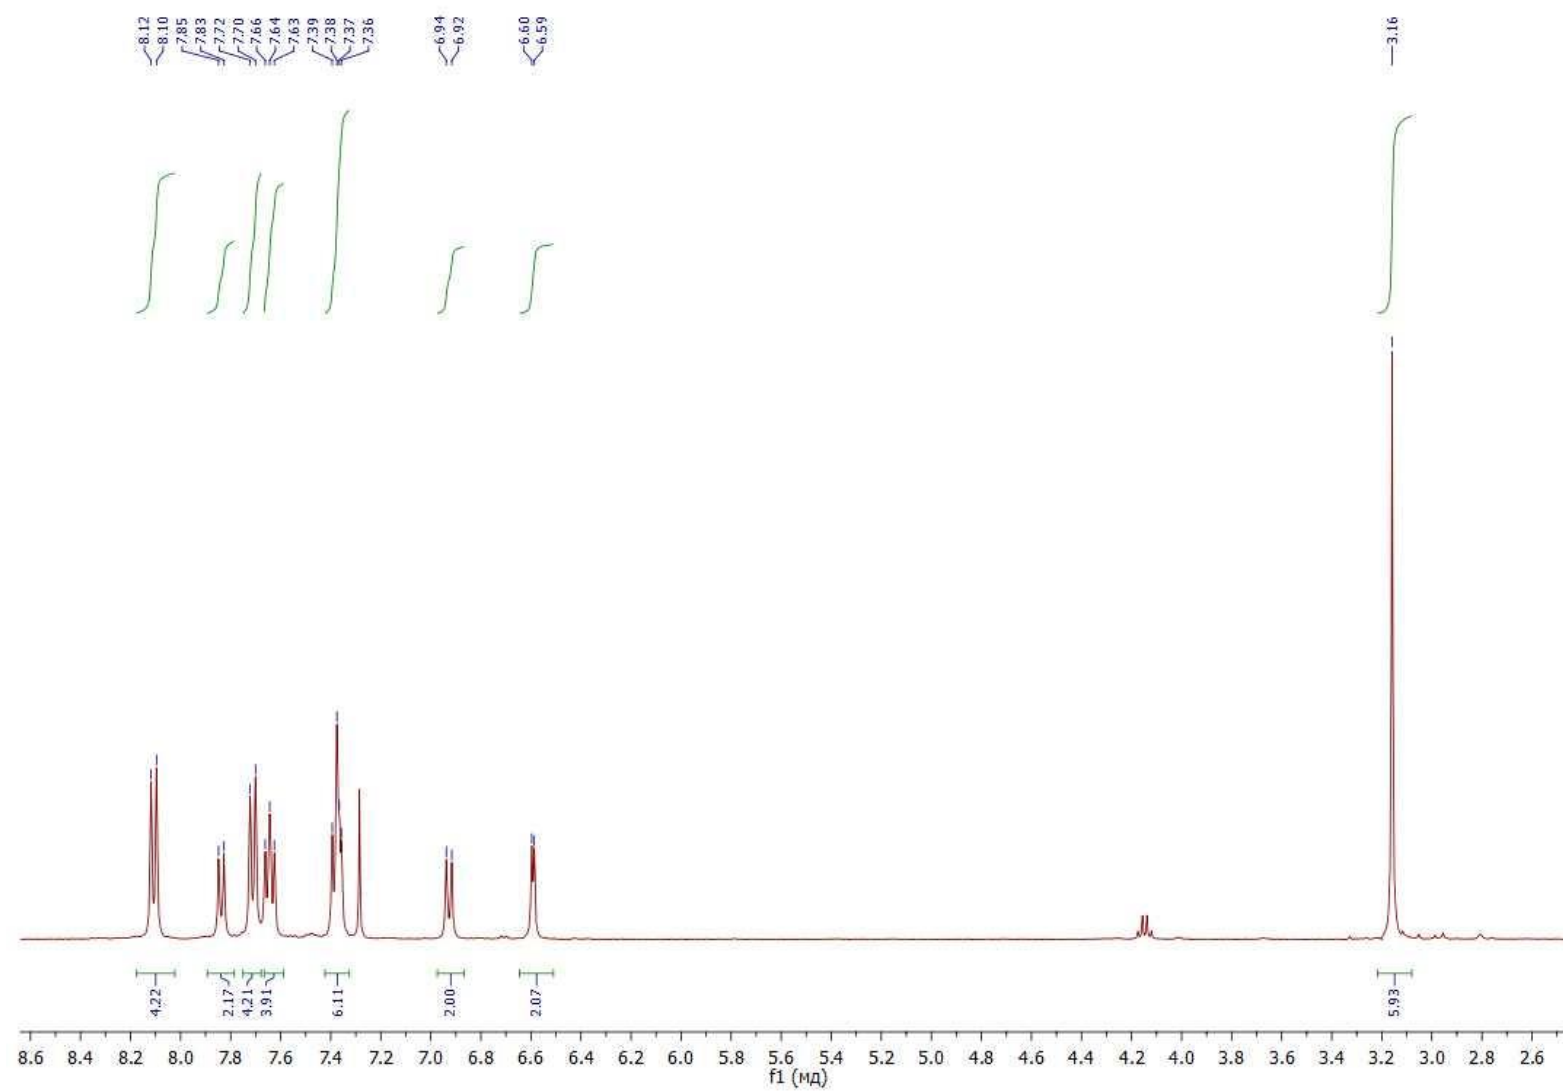

Figure S31. <sup>1</sup>H NMR Spectrum of 6g



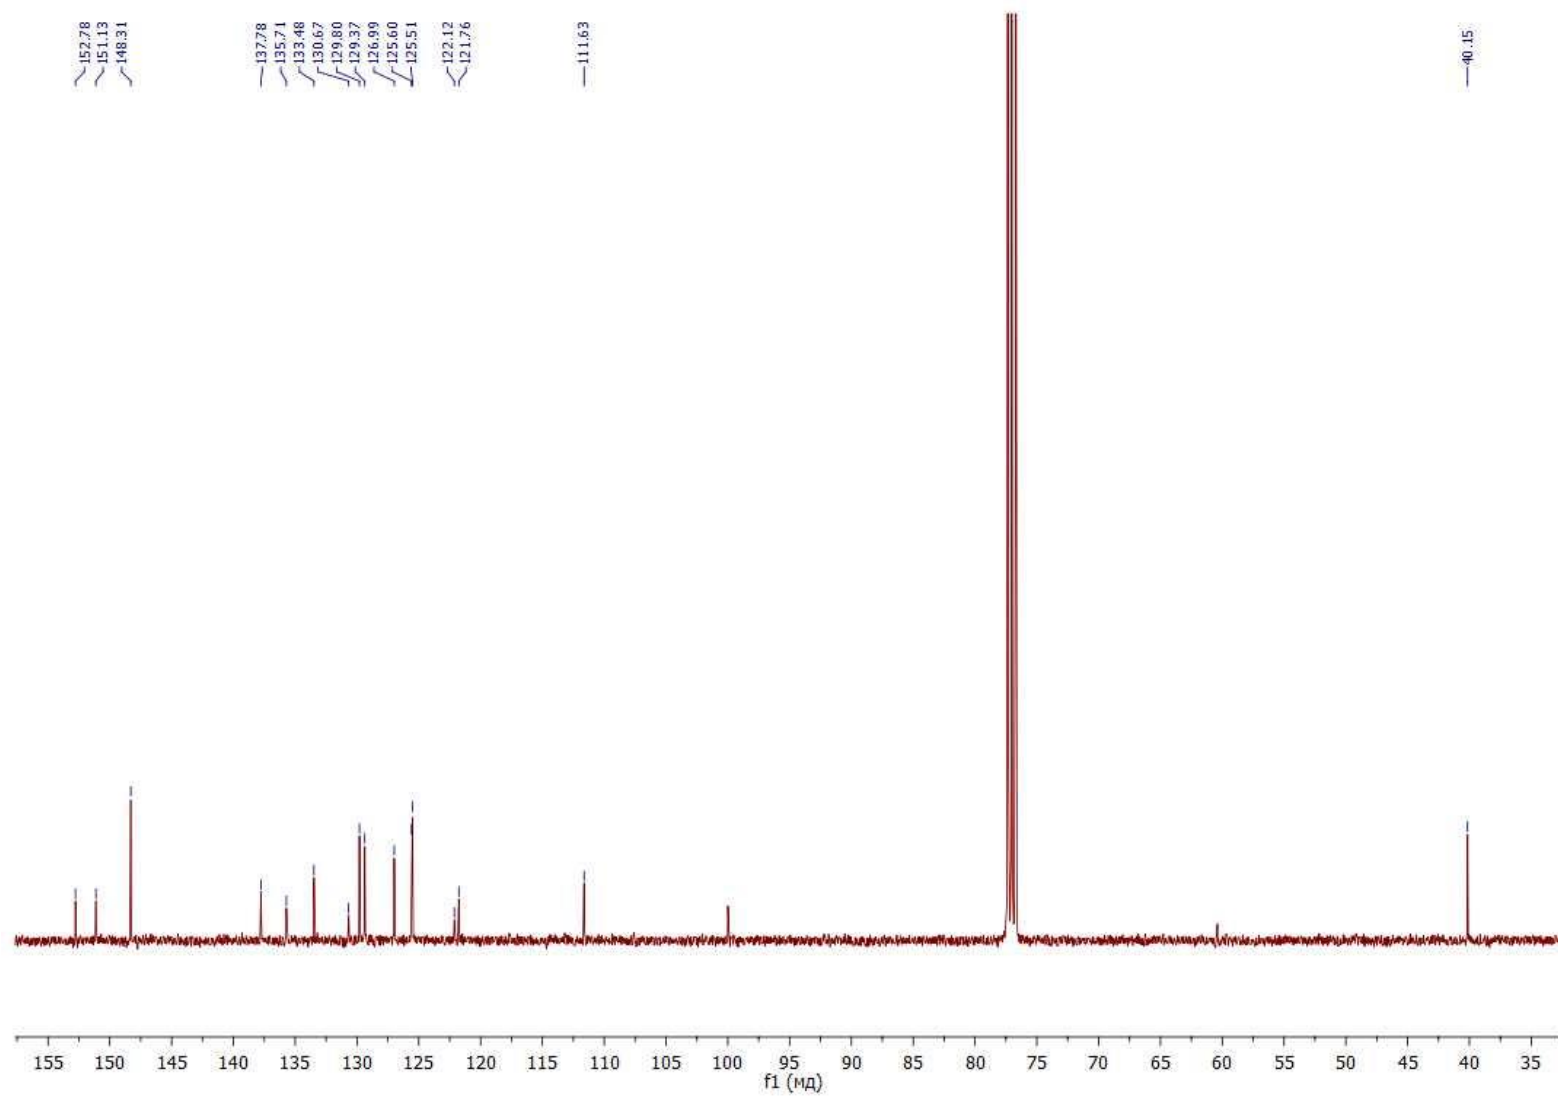

Figure S32.  $^{13}\text{C}$  NMR Spectrum of 6g

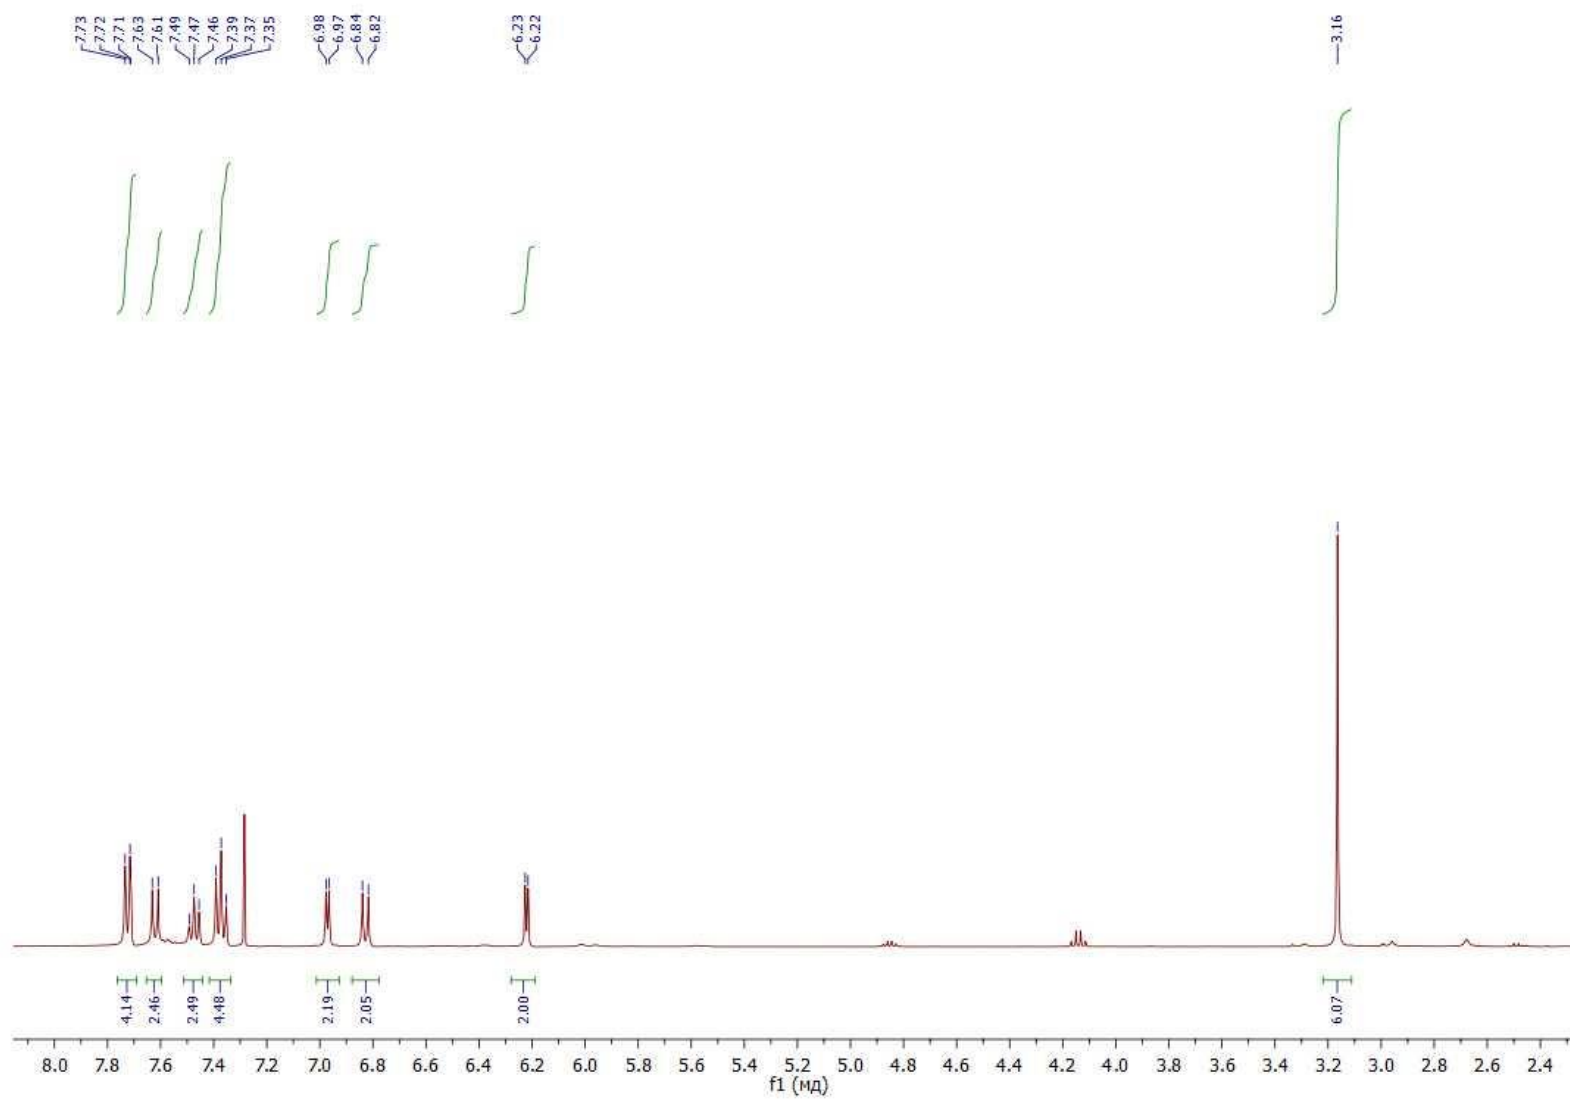

Figure S33. <sup>1</sup>H NMR Spectrum of 6h

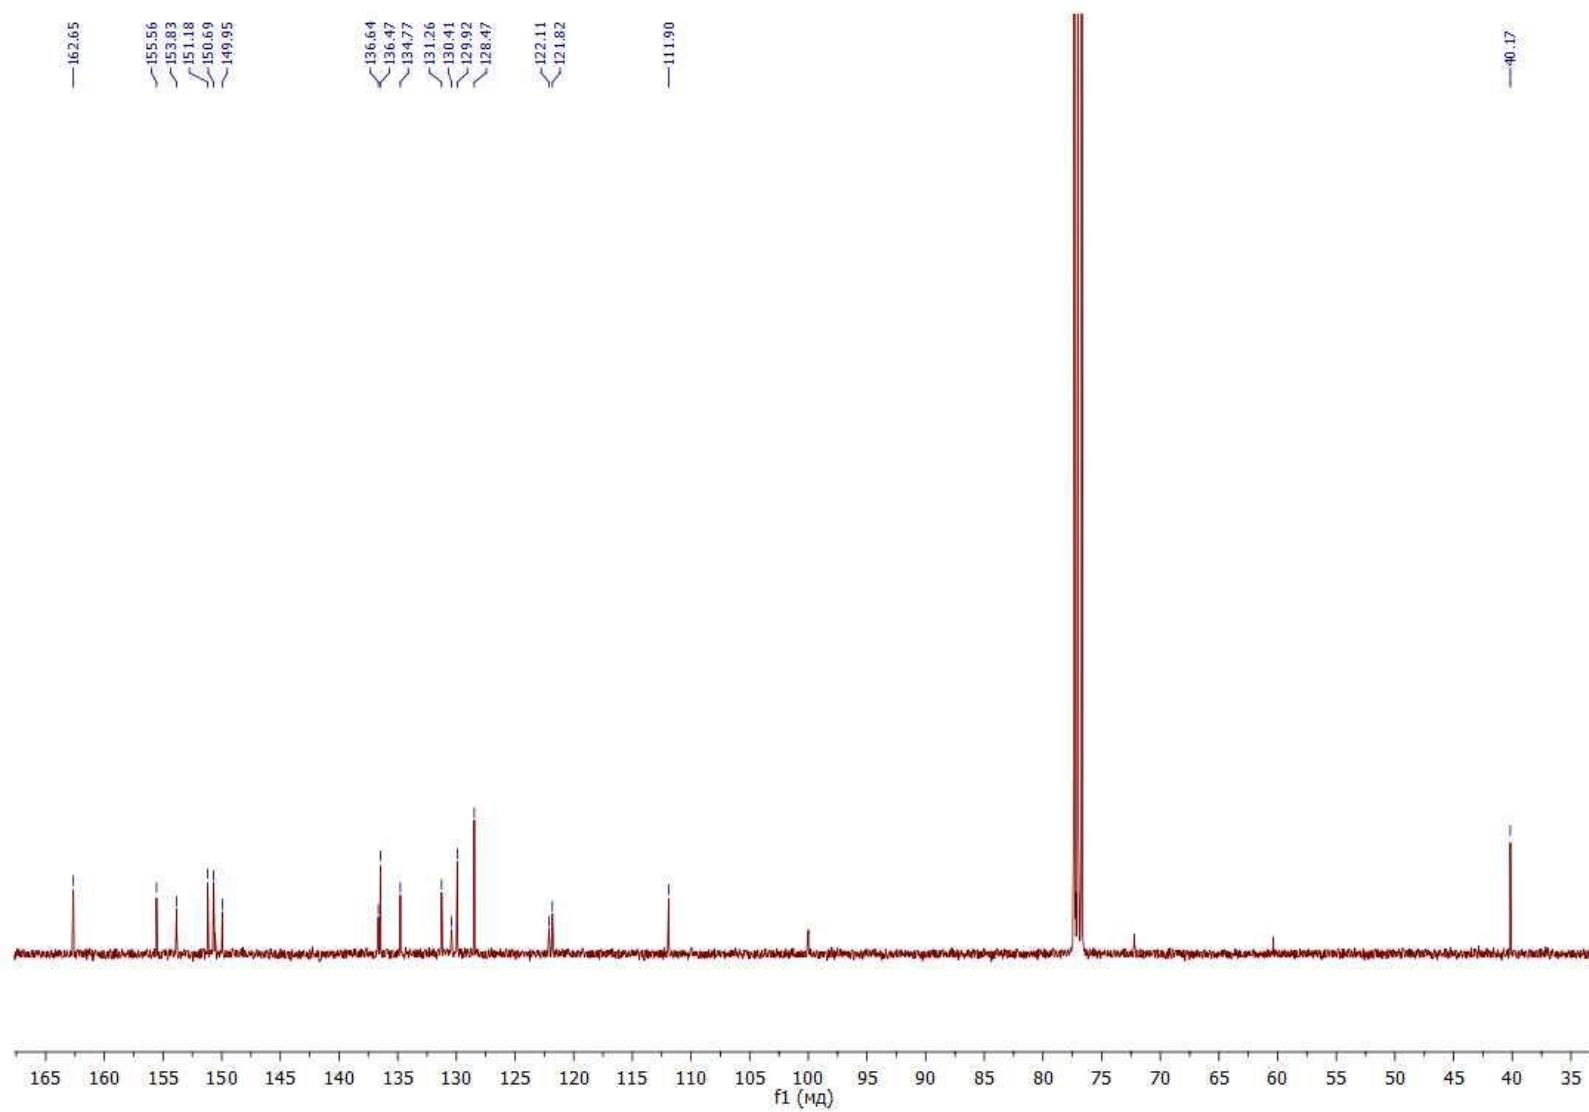

Figure S34.  $^{13}\text{C}$  NMR Spectrum of 6h

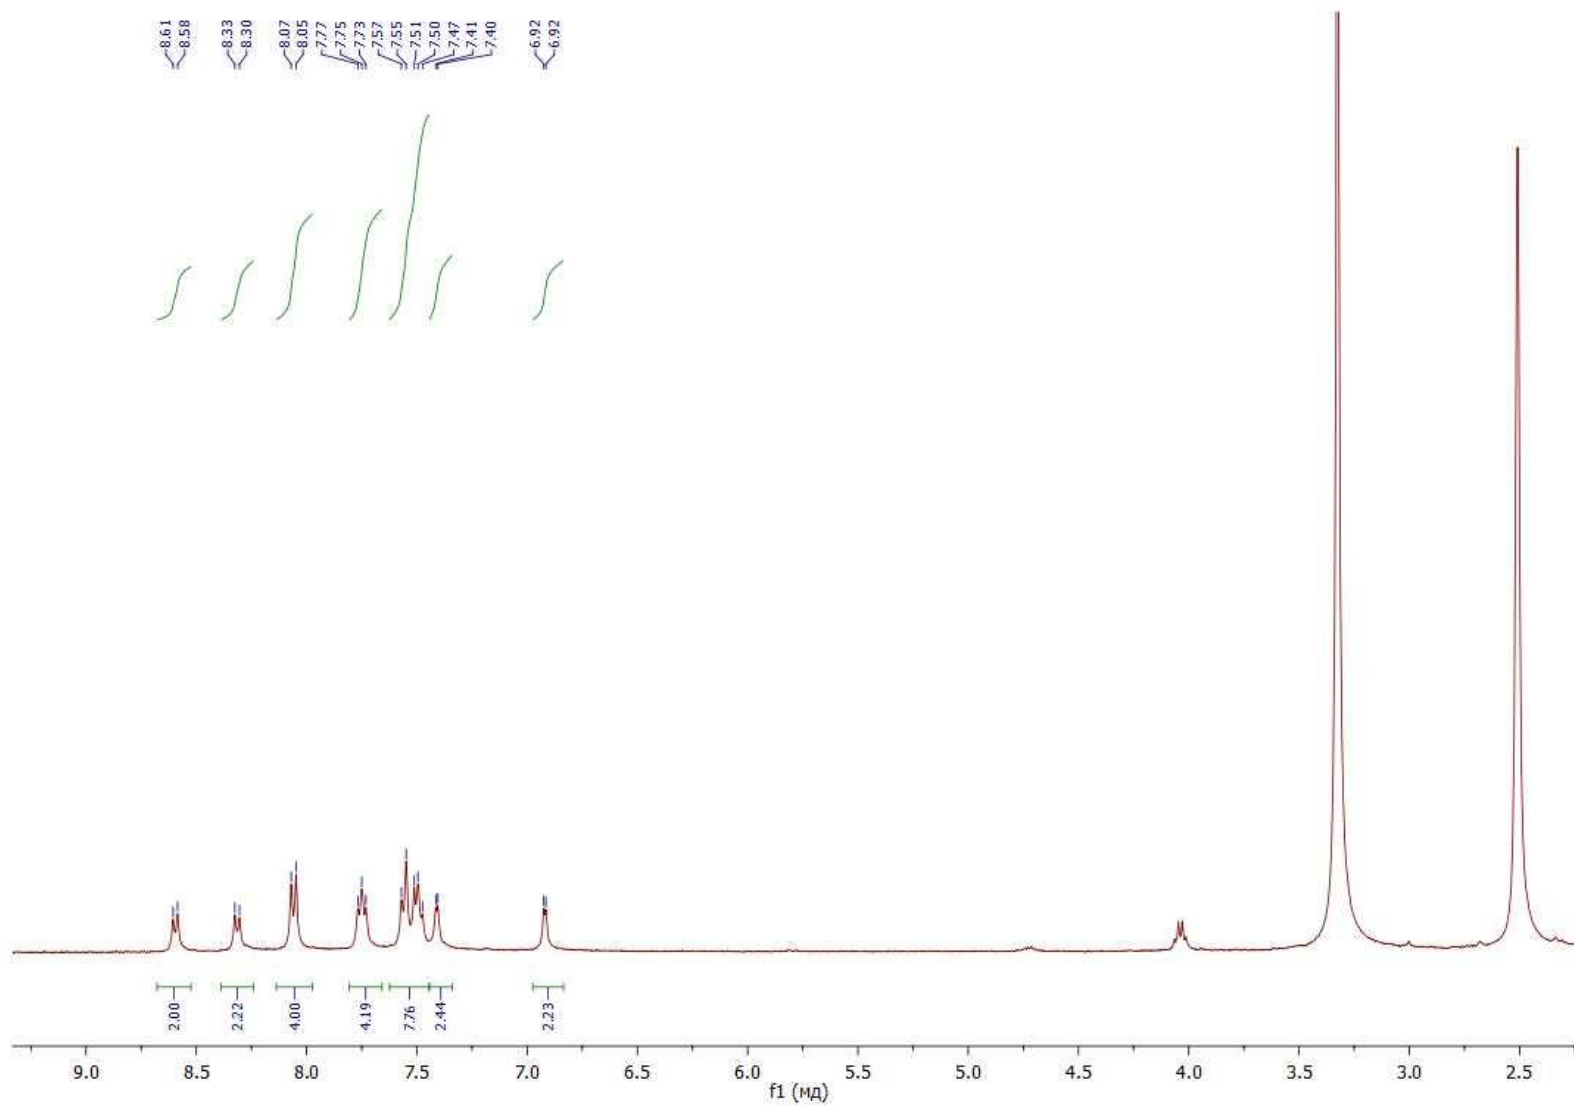

Figure S35.  $^1\text{H}$  NMR Spectrum of 6i

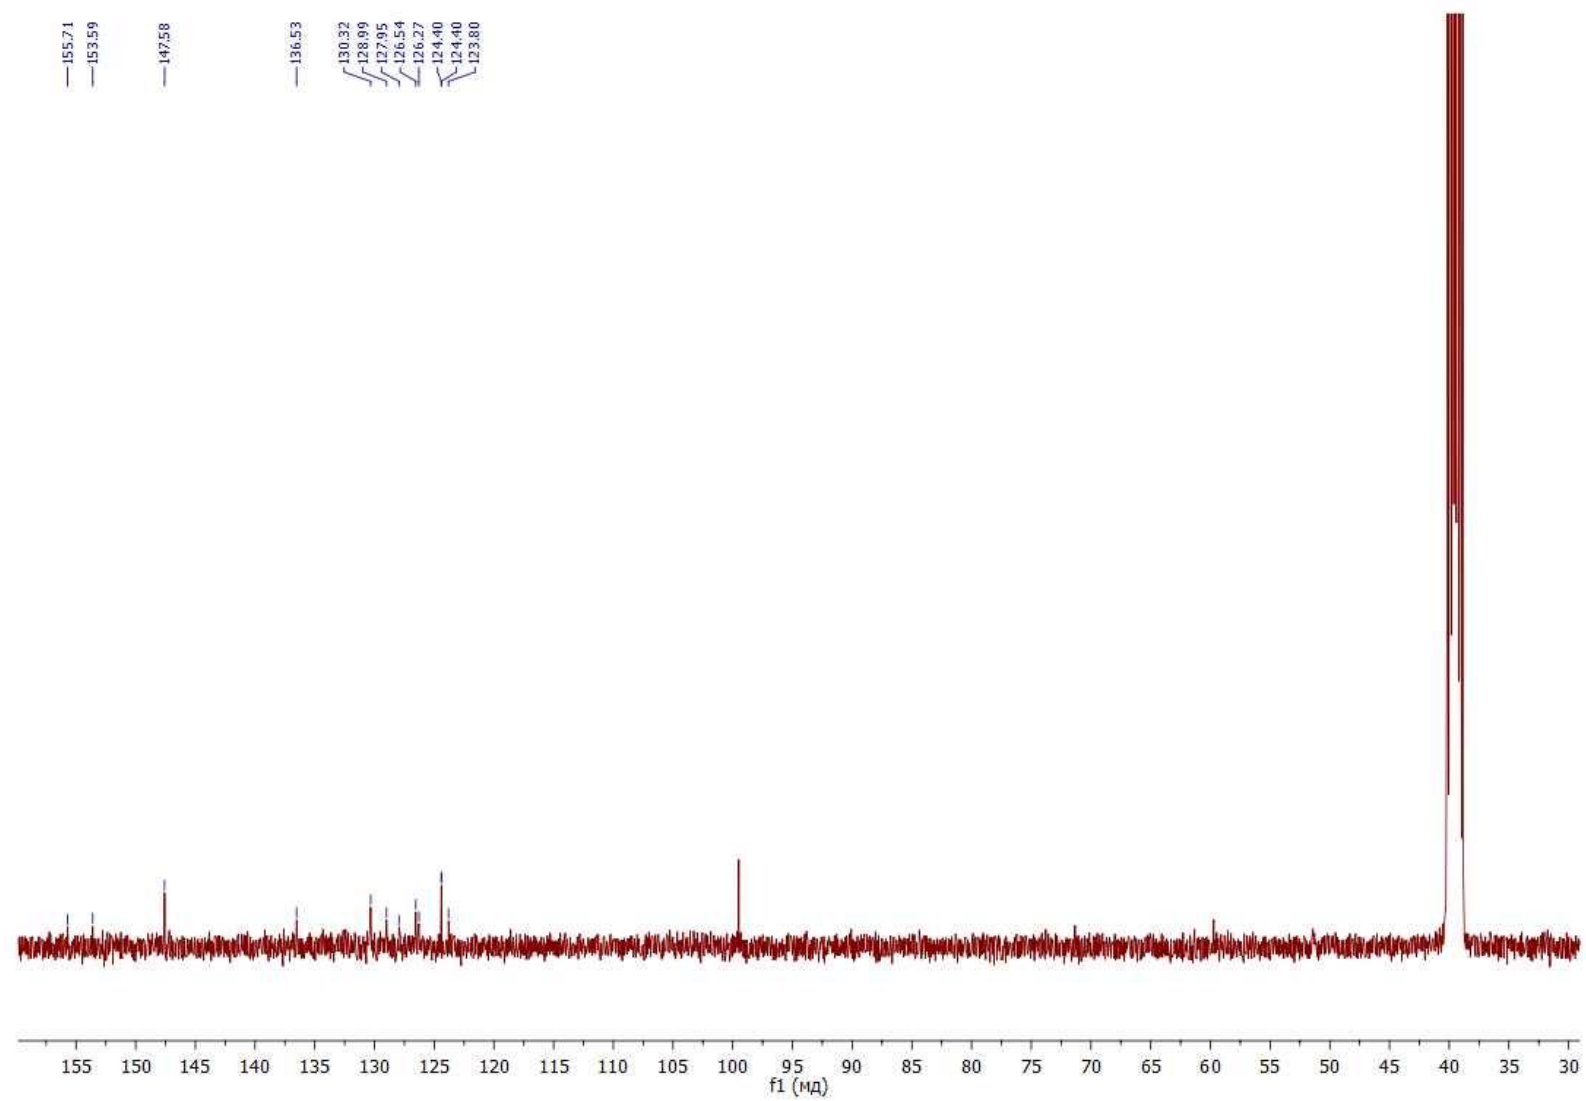

Figure S36.  $^{13}\text{C}$  NMR Spectrum of 6i

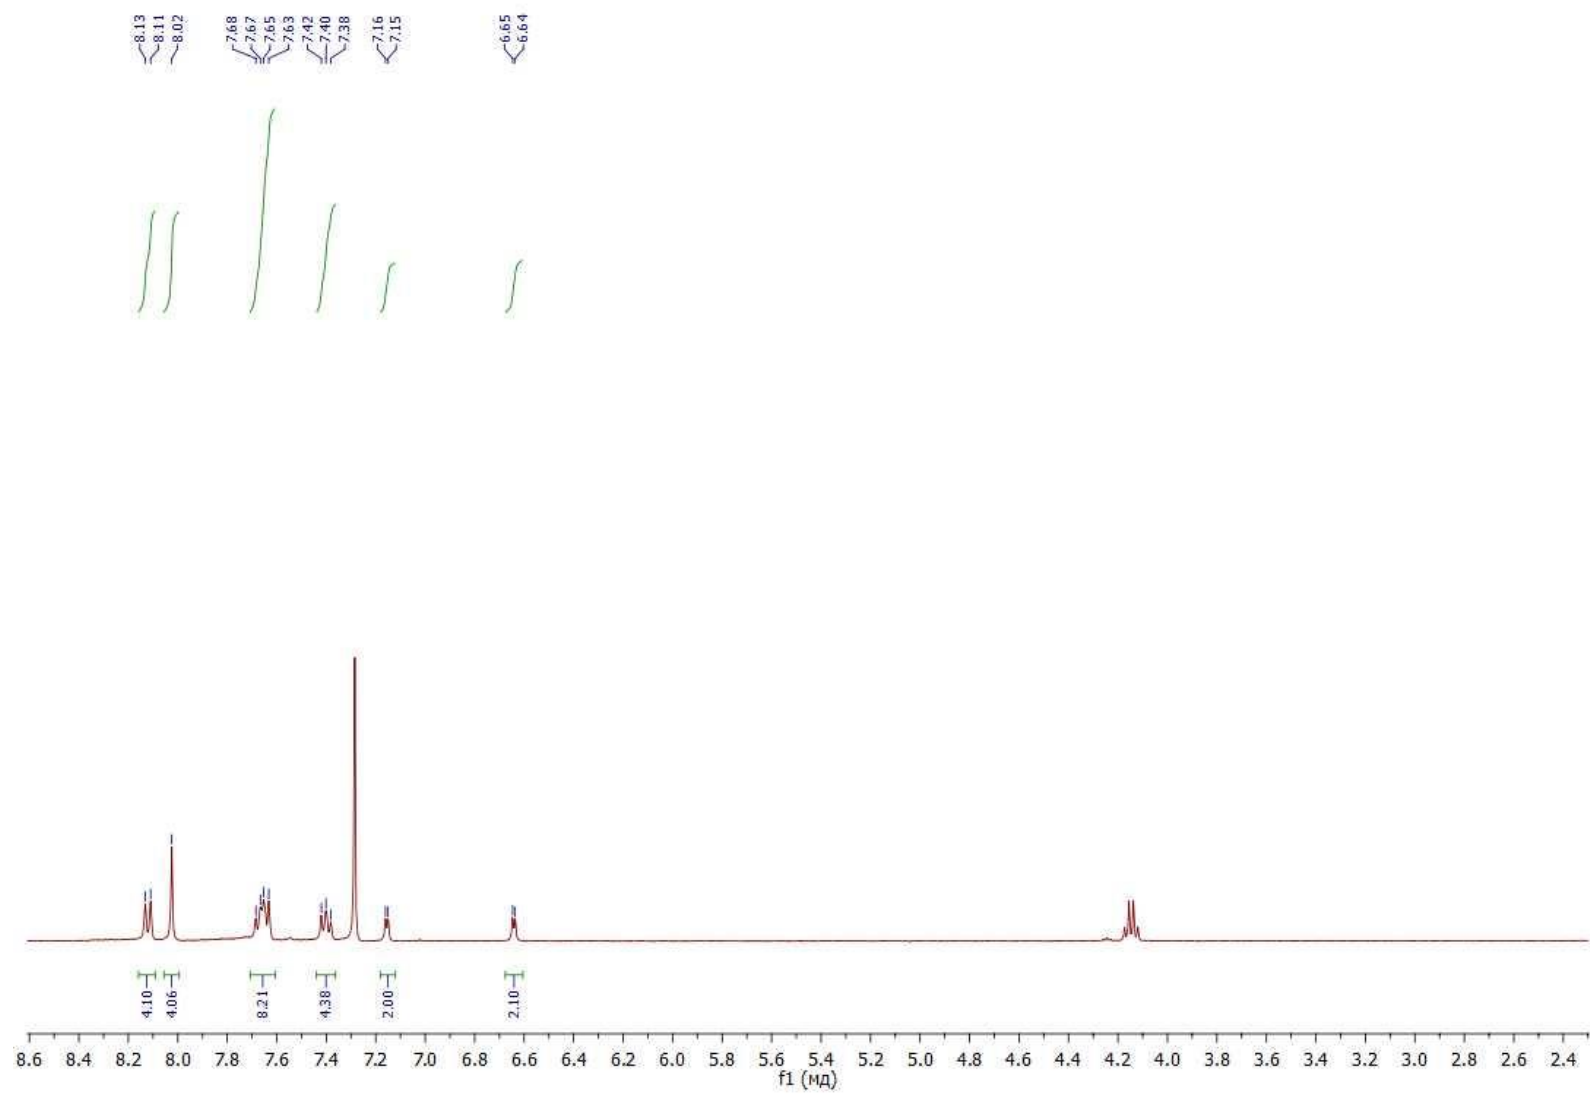

Figure S37.  $^1\text{H}$  NMR Spectrum of 6j
